# Supplementary material for: Calpeptin is a potent cathepsin inhibitor and drug candidate for SARS-CoV-2 infections
Source: PubMed Central journal article supplement (PMC10584882; doi:10.1038/s42003-023-05317-9), 2023-10-18
Supplement: 42003_2023_5317_MOESM2_ESM.pdf [file 42003_2023_5317_MOESM2_ESM.pdf]

# Supplementary information for

## Calpeptin is a potent cathepsin inhibitor and drug candidate for SARS-CoV-2 infections

Patrick YA Reinke<sup>1†</sup>, Edmarcia Elisa de Souza<sup>2†</sup>, Sebastian Günther<sup>1†</sup>, Sven Falke<sup>1</sup>, Julia Lieske<sup>1</sup>, Wiebke Ewert<sup>1</sup>, Jure Loboda<sup>3,4</sup>, Alexander Herrmann<sup>5</sup>, Aida Rahmani Mashhour<sup>1</sup>, Katarina Karničar<sup>3,6</sup>, Aleksandra Usenik<sup>3,6</sup>, Nataša Lindič<sup>3</sup>, Andreja Sekirnik<sup>3</sup>, Viviane Fongaro Botosso<sup>7</sup>, Gláucia Maria Machado Santelli<sup>8</sup>, Josana Kapronezai<sup>7</sup>, Marcelo Valdemir de Araújo<sup>7,9</sup>, Taiana Tainá Silva-Pereira<sup>9,10</sup>, Antônio Francisco de Souza Filho<sup>9</sup>, Mariana Silva Tavares<sup>9</sup>, Lizdany Flórez-Álvarez<sup>2</sup>, Danielle Bruna Leal de Oliveira<sup>9</sup>, Edison Luiz Durigon<sup>9</sup>, Paula Roberta Giaretta<sup>11</sup>, Marcos Bryan Heinemann<sup>10</sup>, Maurice Hauser<sup>12</sup>, Brandon Seychell<sup>13</sup>, Hendrik Böhler<sup>13</sup>, Wioletta Rut<sup>14</sup>, Marcin Drag<sup>14</sup>, Tobias Beck<sup>13,15</sup>, Russell Cox<sup>12</sup>, Henry N Chapman<sup>1,15,16</sup>, Christian Betzel<sup>15,17</sup>, Wolfgang Brehm<sup>1</sup>, Winfried Hinrichs<sup>18</sup>, Gregor Ebert<sup>5,19</sup>, Sharissa L Latham<sup>20,21</sup>, Ana Marcia de Sá Guimarães<sup>9</sup>, Dusan Turk<sup>3,6\*</sup>, Carsten Wrenger<sup>2\*</sup>, Alke Meents<sup>1\*</sup>

\*Corresponding author. Email: dusan.turk@ijs.si, cwrenger@icb.usp.br, alke.meents@desy.de

### This PDF file includes:

Supplementary Text

Figs. S1 to S12, Tables S1

### Supplementary Text

#### Supplementary Note 1: Detailed description of the X-ray crystal structures of M<sup>pro</sup> inhibitor complexes

The structures of Calpeptin and GC-376 bound to M<sup>pro</sup> were previously described<sup>1-4</sup>. Calpeptin binds covalently to Cys<sup>145</sup> of M<sup>pro</sup> (PDB: 7AKU)<sup>1</sup> with its aldehyde group, forming a thiohemiacetal with an interatomic S-O distance of 1.8 Å (Figure S2F)<sup>5,6</sup>. This structure was solved in a monoclinic space group, where Calpeptin occupies the S1 to S3 pockets. Overall, the

27 peptidomimetic backbone of Calpeptin forms hydrogen bonds corresponding to the native peptide  
28 substrate<sup>7</sup>. The backbone carbonyl of His<sup>164</sup> forms a hydrogen bond to the peptidomimetic  
29 Calpeptin amide-nitrogen of the norleucine residue-analog (Figure S12). The terminal ester  
30 carbonyl forms a hydrogen bond with the backbone nitrogen of Glu<sup>166</sup>. The norleucine side chain  
31 exhibits van der Waals contacts with the backbone of Phe<sup>140</sup>, Leu<sup>141</sup>, and Asn<sup>142</sup>. The terminal  
32 Cbz-group is oriented to the S3 pocket between the side chains of Glu<sup>166</sup> and Gln<sup>189</sup> and exhibits  
33 hydrophobic interactions with norleucine (Figure S2F). The structure of GC-376 aldehyde bound  
34 to M<sup>pro</sup> solved in a monoclinic space group (PDB: 7QKA) resembles this conformation.  
35 Substitution of norleucine by 2-oxopyrrolidine leads to additional hydrogen bonds to His<sup>163</sup> and  
36 Glu<sup>166</sup>(Figure S2H). In addition to the monoclinic form with one monomer per asymmetric unit,  
37 M<sup>pro</sup> also crystallizes in an orthorhombic space group containing two monomers per asymmetric  
38 unit<sup>8</sup> and the two monomers within the dimer exhibit structural variations. The structure of  
39 Calpeptin derived from S-Calpeptin bound to M<sup>pro</sup> was solved in an orthorhombic space group  
40 (PDB 7Z3U) and shows more flexibility with respect to the conformation of the Cbz- group  
41 (Figure S2D). This group is oriented in the S4 pocket in one monomer, while it exhibits an  
42 alternative conformation oriented to the S3 or S4 pocket in the other monomer, a similar  
43 flexibility as observed for GC-376 analogs<sup>9</sup>. This is linked to an alternative orientation of the loop  
44 containing Gln<sup>189</sup>, which is shifted by about 2 Å, further opening this pocket. In addition to the  
45 previously described interactions of Calpeptin, the Cbz-group interactions via hydrophobic  
46 interactions with the backbone of Thr<sup>190</sup> and Gln<sup>192</sup> are evident in the S4 pocket. In the- structure  
47 co-crystallized with S-Calpeptin, the monomers exhibit a NOS-bridge, which is an oxygen-  
48 mediated link between Cys<sup>22</sup> and Lys<sup>61</sup> (molecule B) and a SONOS-bridge, which is a three-way  
49 covalent bond between Cys<sup>22</sup>, Cys<sup>44</sup> and Lys<sup>61</sup> (molecule A). These covalent links in M<sup>pro</sup> were  
50 previously observed<sup>10</sup>.

51

52 **Supplementary Note 2: Detailed description of the X-ray crystal structures of CatK/V**

53 **Calpeptin complex**

54 The binding mode of Calpeptin to CatK (PDB: 8C3D) and CatV (PDB: 7QGW) is similar to that  
55 of CatL, which can be explained by the high conservation of the active site cleft (Figure S12).

56 Small differences occur in the S3-pocket in the vicinity of the terminal Cbz-group of Calpeptin.

57 While in CatL Leu<sup>69</sup> and Tyr<sup>72</sup> form a hydrophobic pocket in which the phenyl ring is located,

58 this hydrophobic pocket is less voluminous in CatK because it is constrained by Tyr<sup>67</sup> (in CatL

59 Leu<sup>69</sup>), which is oriented toward the Cbz-group, resulting in a restriction of the pocket that forces

60 the phenyl ring towards Asp<sup>61</sup> (in CatL Glu<sup>63</sup>). CatV Phe<sup>69</sup> and Arg<sup>72</sup> (in CatL Leu<sup>69</sup> and Tyr<sup>72</sup>)

61 are directed towards this pocket, leading to a restriction of the pocket and forcing the phenyl ring

62 into a slightly different orientation towards Gln<sup>63</sup> (in CatL Glu<sup>63</sup>).

63

64 **Supplementary Note 3: Analysis of TMPRSS2 expression by Western blot**

65 TMPRSS2 is synthesized as a single-chain zymogen and cleaves SARS-CoV-2 S protein

66 extracellularly. To determinate the expression status of endogenous TMPRSS2 during growth

67 phase we treated LC-HK2 and VERO-CCL81 cells with trypsin to remove surface proteins.

68 TMPRSS2 was barely detectable as a single band in VERO-CCL81 and detectable in LC-HK2 as

69 ~ 54-kDa band, representing the zymogen (Figure S4). We detected two additional prominent

70 bands with about ~64 kDa and ~110 kDa in human LC-HK2 probably generated by glycosylation

71 events under reducing conditions in human TMPRSS2, as previously reported (Figure S4)<sup>11</sup>.

72

73 **Supplementary Note 4: Calpeptin cell experiments**

74 To test whether the viral particles are entrapped in endosomes after S-Calpeptin treatment, the

75 distribution of S-protein containing vesicle size in infected LC-HK2 cells was analyzed by

76 fluorescence microscopy. This analysis did not reveal significant differences between S-Calpeptin  
77 treated cells and the control group (Figure S5).

78

### 79 **Supplementary Note 5: Calpeptin toxicity experiments in hamsters**

80 At the time of this study, we did not find any study that used Calpeptin in hamsters. Therefore,  
81 prior to the antiviral experiment, we performed a small study to investigate if different doses of  
82 Calpeptin could lead to acute toxicity in hamsters. Animals were subjected to daily subcutaneous  
83 as described in the methods section. The route of administration and doses were chosen based on  
84 literature reports of the use of Calpeptin in mouse studies<sup>12-18</sup>. Clinical signs and weight were  
85 followed until day 6, when the animals were euthanized, necropsied, and organs were collected  
86 for histopathology analysis. Treated animals did not display acute toxicity-related clinical signs or  
87 weight loss during the experiment (Figure S8A and B) nor any noteworthy histopathological  
88 lesion in brain, liver, pancreas, gastro-intestinal tract, kidney, lungs, spleen, or trachea. However,  
89 a complete blood cell count performed on day 6 showed marked leukopenia caused by  
90 lymphopenia and neutropenia in animals treated with 2 mg/kg and 3 mg/kg of S-Calpeptin  
91 compared to those that received only 1 mg/kg of S-Calpeptin or 1:100 DMSO (Figure S8C-F).  
92 For this reason, we opted to test the dose of 1 mg/kg of S-Calpeptin in the anti-viral animal  
93 experiment (Figure S8A and B).

94

### 95 **Supplementary Note 6: Histopathological lesions in hamsters infected with SARS-CoV-2**

96 Corroborating previous studies<sup>19-22</sup>, typical histopathological lesions were seen in hamsters  
97 inoculated with SARS-CoV-2 (G1 and G2). Findings in the lungs included bronchointerstitial  
98 pneumonia, suppurative bronchitis, endothelialitis, necrosis of epithelial cells, and hyperplasia of  
99 bronchial and alveolar type II epithelial cells (Figure S6). Occasional atypical syncytial cells were  
100 seen. Areas of interstitial pulmonary fibrosis and/or inflammation were occasionally detected on

101 both infected groups. On day 7 p.i., there were higher tissue repair scores in infected animals  
102 (Figure S6F), coinciding with a lower viral load in respiratory tissues and beginning of the  
103 recovery phase (Figure 5). Lesions in the trachea of infected hamsters consisted of loss of cilia,  
104 degeneration and/or necrosis of epithelial cells and inflammatory infiltrate in the lumen and/or in  
105 the lamina propria. Histopathology analysis showed no statistically significant differences in  
106 lesion scores between SARS-CoV-2 infected animals that were treated with S-Calpeptin and to  
107 those that were not (Figure S7). Lung vascular lesions are a hallmark of COVID-19 in hamsters<sup>21</sup>.  
108 Although S-Calpeptin-treated animals showed lower scores for vascular damage compared to the  
109 untreated group on days 5 and 7 p.i., these results were also not statistically significant (Figure  
110 S7). As expected, the lungs and trachea of hamsters from control groups (G3 and G4) were  
111 unremarkable.

112

## References

1. Günther, S. *et al.* X-ray screening identifies active site and allosteric inhibitors of SARS-CoV-2 main protease. *Science* **372**, 642–646 (2021).
2. Vuong, W. *et al.* Feline coronavirus drug inhibits the main protease of SARS-CoV-2 and blocks virus replication. *Nat Commun* **11**, 4282 (2020).
3. Fu, L. *et al.* Both Boceprevir and GC376 efficaciously inhibit SARS-CoV-2 by targeting its main protease. *Nat Commun* **11**, 4417 (2020).
4. Ma, C. *et al.* Boceprevir, GC-376, and calpain inhibitors II, XII inhibit SARS-CoV-2 viral replication by targeting the viral main protease. *Cell Res* **30**, 678–692 (2020).
5. Ramos-Guzmán, C. A., Ruiz-Pernía, J. J. & Tuñón, I. Multiscale Simulations of SARS-CoV-2 3CL Protease Inhibition with Aldehyde Derivatives. Role of Protein and Inhibitor Conformational Changes in the Reaction Mechanism. *ACS Catal.* **11**, 4157–4168 (2021).
6. Kuchitsu, K., Fukuyama, T., Tamaru, Y., Yoshida, Z. & Tabushi, I. Carbon-sulfur bond distances and sulfur valence angles in 5-thiabicyclo[2.1.1]hexane and 7-thiabicyclo[2.2.1]heptane as determined by gas electron diffraction. *J. Am. Chem. Soc.* **93**, 2799–2800 (1971).
7. Lee, J. *et al.* Crystallographic structure of wild-type SARS-CoV-2 main protease acyl-enzyme intermediate with physiological C-terminal autoprocessing site. *Nat Commun* **11**, 5877 (2020).
8. Zhang, L. *et al.* Crystal structure of SARS-CoV-2 main protease provides a basis for design of improved  $\alpha$ -ketoamide inhibitors. *Science* **368**, 409–412 (2020).
9. Sacco, M. D. *et al.* Structure and inhibition of the SARS-CoV-2 main protease reveal strategy for developing dual inhibitors against Mpro and cathepsin L. *Sci Adv* **6**, eabe0751 (2020).
10. Rabe von Pappenheim, F. *et al.* Widespread occurrence of covalent lysine–cysteine redox switches in proteins. *Nat Chem Biol* 1–8 (2022) doi:10.1038/s41589-021-00966-5.
11. Zhang, Y. *et al.* Transmembrane serine protease TMPRSS2 implicated in SARS-CoV-2 infection is autoactivated intracellularly and requires N-glycosylation for regulation. *J Biol Chem* **298**, 102643 (2022).
12. Bandaru, S. *et al.* Targeting Filamin A Reduces Macrophage Activity and Atherosclerosis. *Circulation* **140**, 67–79 (2019).
13. Song, L.-J. *et al.* Inhibition of angiotensin II and calpain attenuates pleural fibrosis. *Pulmonary Pharmacology & Therapeutics* **48**, 46–52 (2018).

- 142 14. Tabata, C., Tabata, R. & Nakano, T. The calpain inhibitor calpeptin prevents bleomycin-induced pulmonary  
143 fibrosis in mice. *Clinical and Experimental Immunology* **162**, 560–567 (2010).
- 144 15. Yoshida, M. *et al.* Calpain inhibitor calpeptin suppresses pancreatic cancer by disrupting cancer-stromal  
145 interactions in a mouse xenograft model. *Cancer Sci* **107**, 1443–1452 (2016).
- 146 16. Mani, S. K. *et al.* Calpain inhibition preserves myocardial structure and function following myocardial  
147 infarction. *American Journal of Physiology-Heart and Circulatory Physiology* **297**, H1744–H1751 (2009).
- 148 17. Samantaray, S. *et al.* Inhibition of Calpain Activation Protects MPTP-Induced Nigral and Spinal Cord  
149 Neurodegeneration, Reduces Inflammation, and Improves Gait Dynamics in Mice. *Mol Neurobiol* **52**, 1054–  
150 1066 (2015).
- 151 18. Zuo, J. *et al.* Calpeptin attenuates cigarette smoke-induced pulmonary inflammation via suppressing  
152 calpain/I $\kappa$ B $\alpha$  signaling in mice and BEAS-2B cells. *Pathol Res Pract* **214**, 1199–1209 (2018).
- 153 19. Imai, M. *et al.* Syrian hamsters as a small animal model for SARS-CoV-2 infection and countermeasure  
154 development. *Proc Natl Acad Sci U S A* **117**, 16587–16595 (2020).
- 155 20. Chan, J. F.-W. *et al.* Simulation of the Clinical and Pathological Manifestations of Coronavirus Disease 2019  
156 (COVID-19) in a Golden Syrian Hamster Model: Implications for Disease Pathogenesis and Transmissibility.  
157 *Clin Infect Dis* **71**, 2428–2446 (2020).
- 158 21. Gruber, A. D. *et al.* Standardization of Reporting Criteria for Lung Pathology in SARS-CoV-2–infected  
159 Hamsters: What Matters? *Am J Respir Cell Mol Biol* **63**, 856–859 (2020).
- 160 22. Sia, S. F. *et al.* Pathogenesis and transmission of SARS-CoV-2 in golden hamsters. *Nature* **583**, 834–838 (2020).
- 161

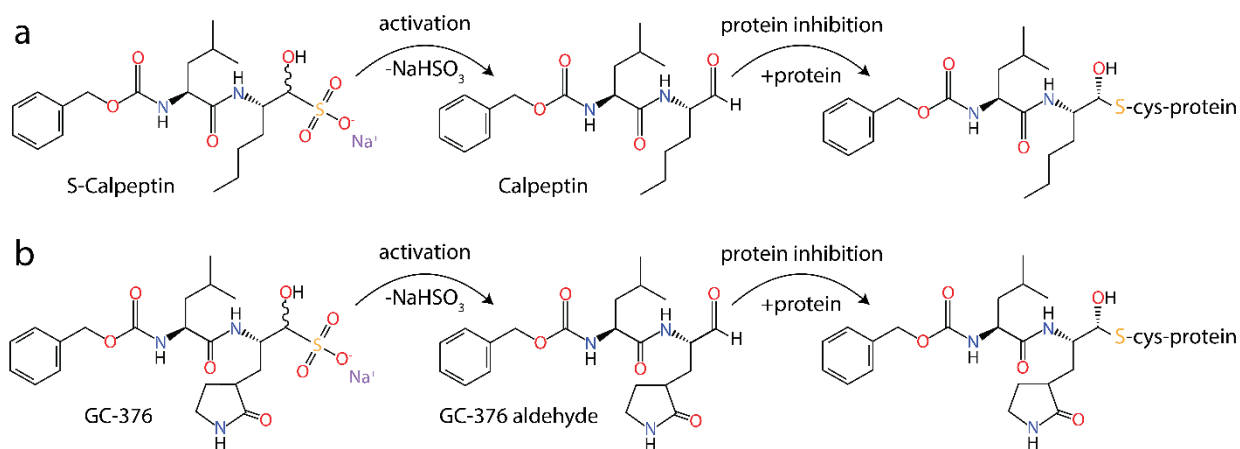

162

163 **Figure S1.**

164 **Activation of the prodrugs S-Calpeptin and GC-376.** (a) S-Calpeptin and (b) GC-376 contain a  
 165 sulfonated aldehyde, which under physiological conditions slowly converts into hydrogensulfite  
 166 and the aldehyde, thereby unmasking the warhead. The aldehyde warhead binds covalently to  
 167 catalytic cysteines of cathepsins and M<sup>Pro</sup>.



# Human CatL

# SARS-CoV-2 M<sup>pro</sup>

Active site

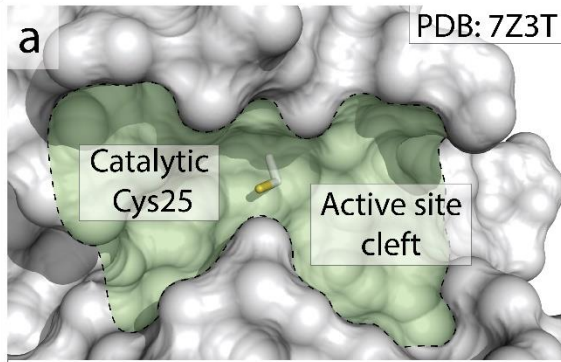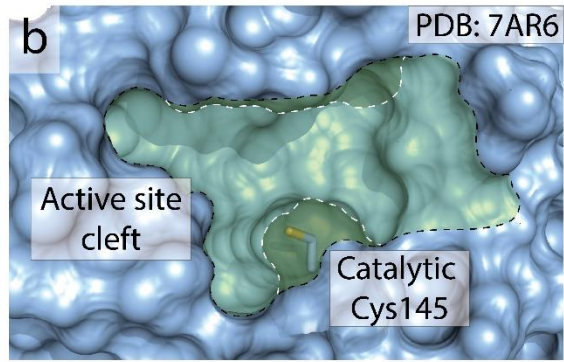

Calpeptin

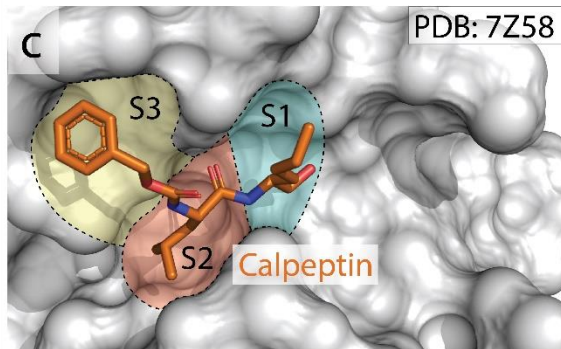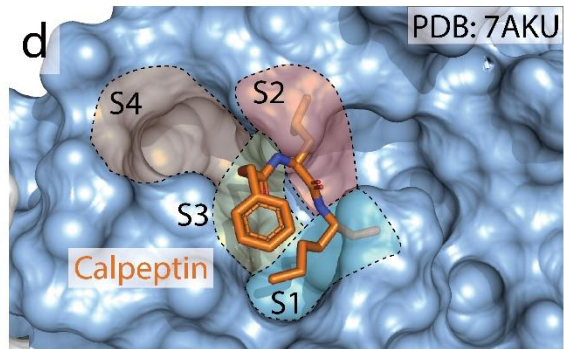

S-Calpeptin

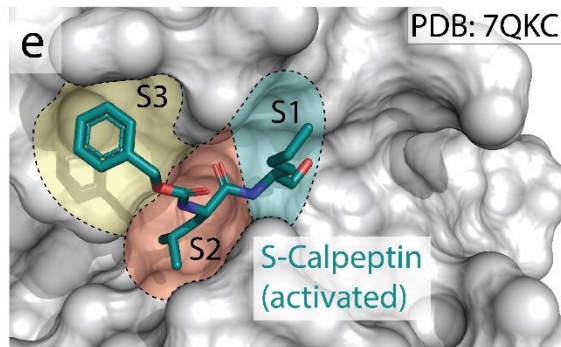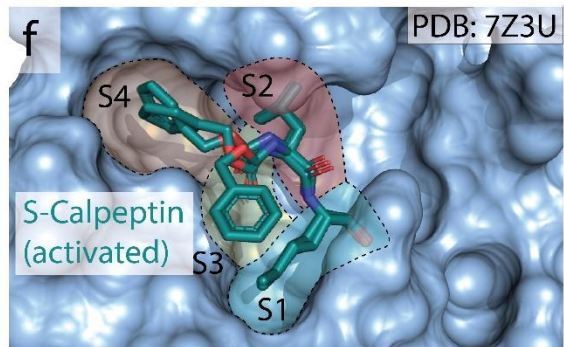

GC-376

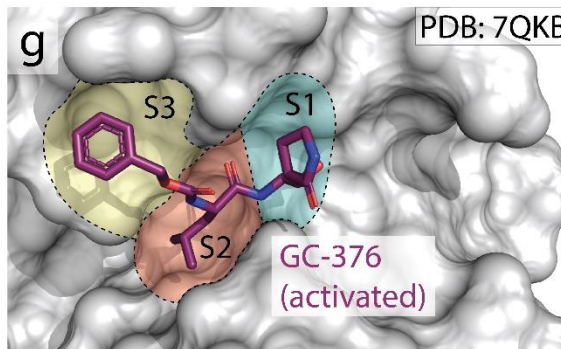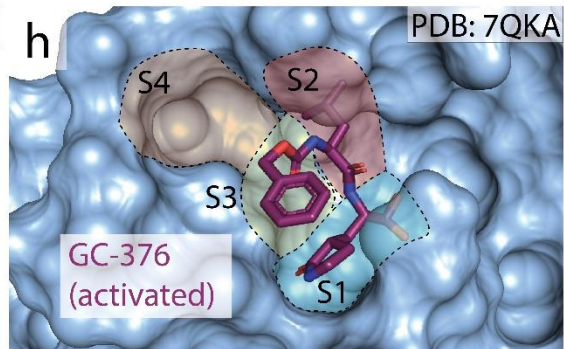

168

169

170 **Figure S2.**

171 **Comparison of inhibitor binding to the active sites of CatL and M<sup>pro</sup>.** Closeup view of the  
172 active site (green) of CatL (a, grey surface) and M<sup>pro</sup> (b, blue surface). M<sup>pro</sup> residues Ser<sup>46</sup> and  
173 Asn<sup>142</sup> are shown as a transparent area (white dashes, dark green area) to reveal the complete  
174 extend of the binding site underneath. The central catalytic cysteine is shown in stick  
175 representation. Calpeptin (orange sticks) bound to CatL (c) and M<sup>pro</sup> (d). Important substrate  
176 binding pockets are colored and labelled S1 to S4. Calpeptin derived from S-Calpeptin (teal  
177 sticks) bound to CatL (e) and M<sup>pro</sup> (f), and GC-376 aldehyde derived from GC-376 (purple sticks)  
178 bound to CatL (g) and M<sup>pro</sup> (h) in similar representation.

179

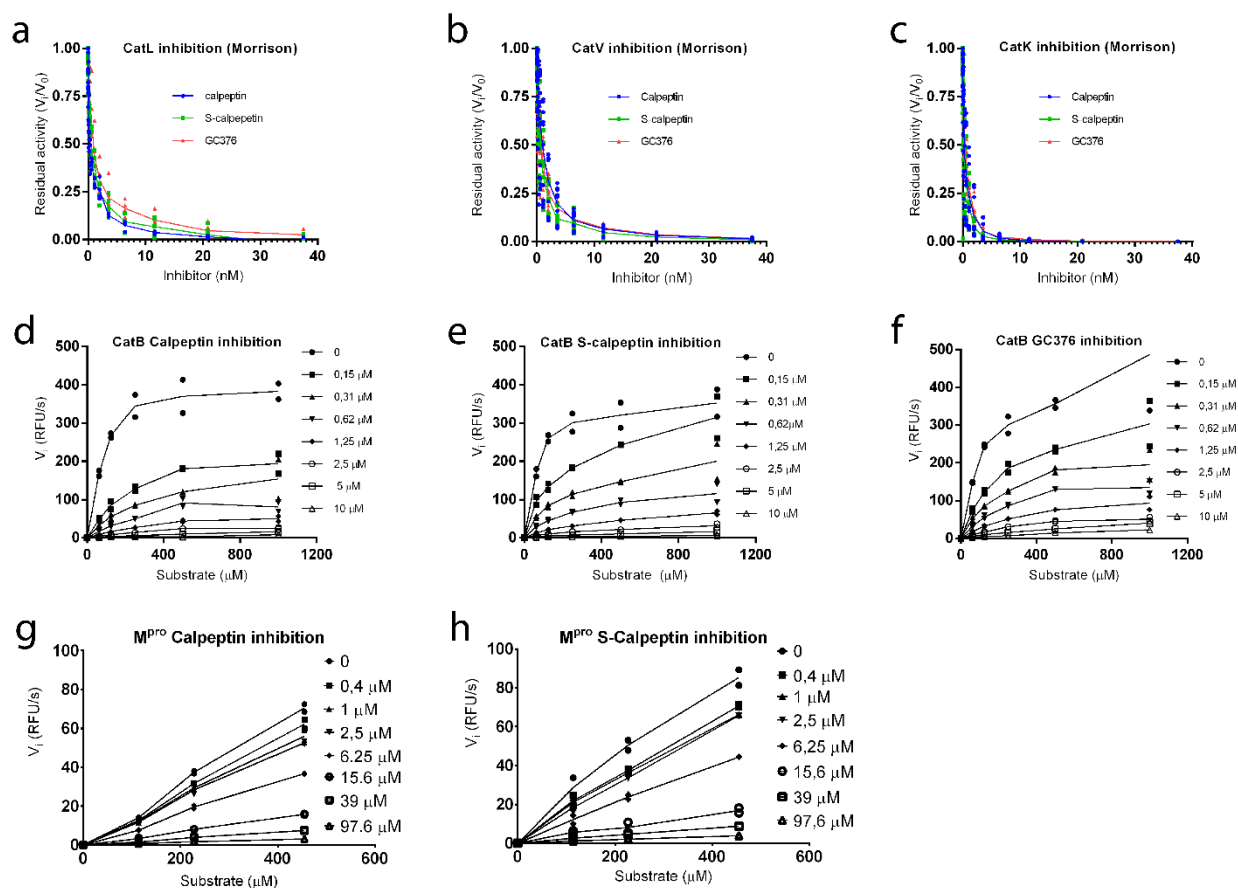

180

181 **Figure S3.**

182 **Inhibition of human cathepsin and SARS-CoV-2 Mpro by Calpeptin and Calpeptin-like**  
 183 **compounds ( $K_i$  determination).** (a-c) Morrison inhibition plots of residual cathepsin activity  
 184 against different inhibitor concentrations (standard errors are shown dotted lines). (d-h) Mixed-  
 185 model inhibition plots of either cathepsin or M<sup>pro</sup> reaction velocities (RFU/seconds) measured at  
 186 several substrate concentrations for different inhibitor concentrations (standard errors are shown  
 187 as bars).

188

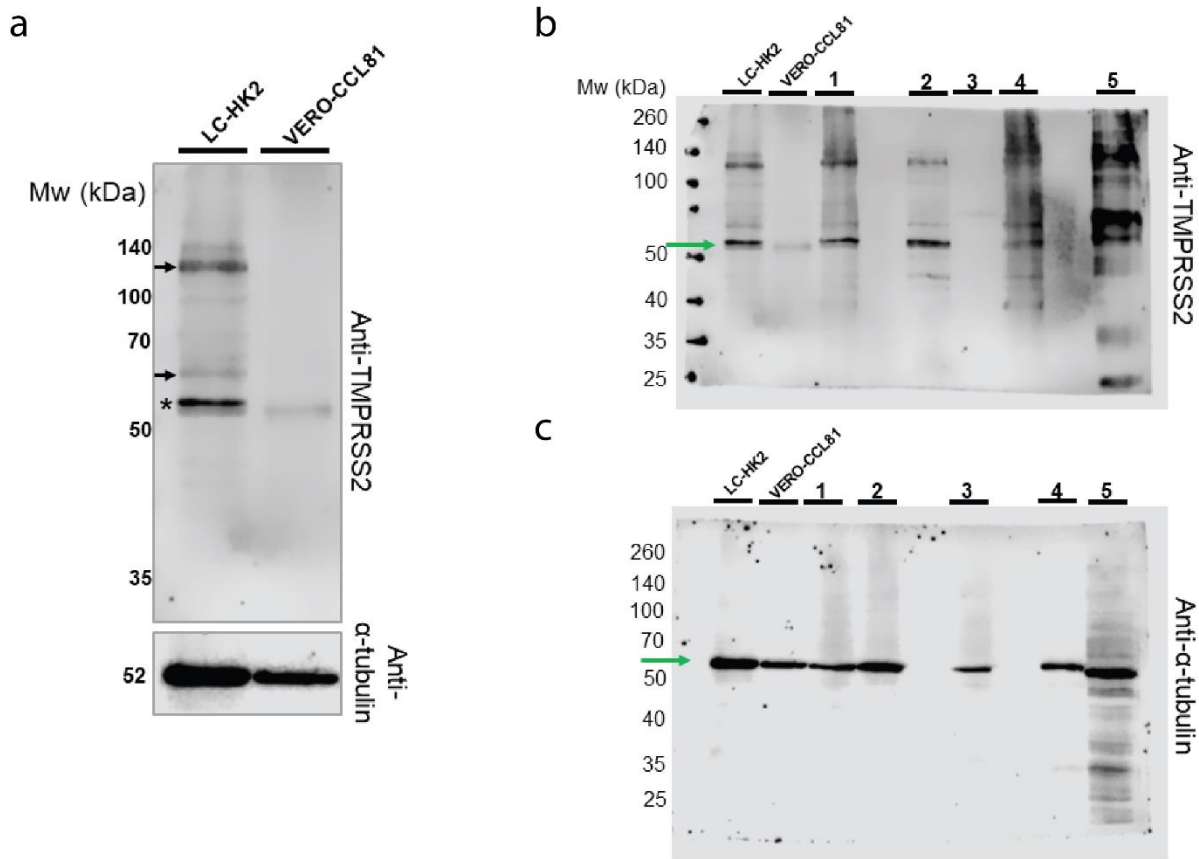

**Figure S4.**

**Analysis of TMPRSS2 expression by Western blot.** (a) LC-HK2 and VERO-CCL81 cells were lysed and subjected to SDS-PAGE following Western blot analysis under reducing conditions. TMPRSS2 was expressed at low levels in VERO-CCL81 and clearly expressed in LC-HK2 detectable as ~ 54-kDa band corresponding to the proenzyme form (zymogen) (\*) and two additional major bands migrating at ~ 64-kDa and ~ 110-130 kDa (arrows). As loading control  $\alpha$ -tubulin was used. (b-c) Uncropped images of source Western blots shown in (a). Wells 1 to 5 in (b-c) are not included in the manuscript experiments.



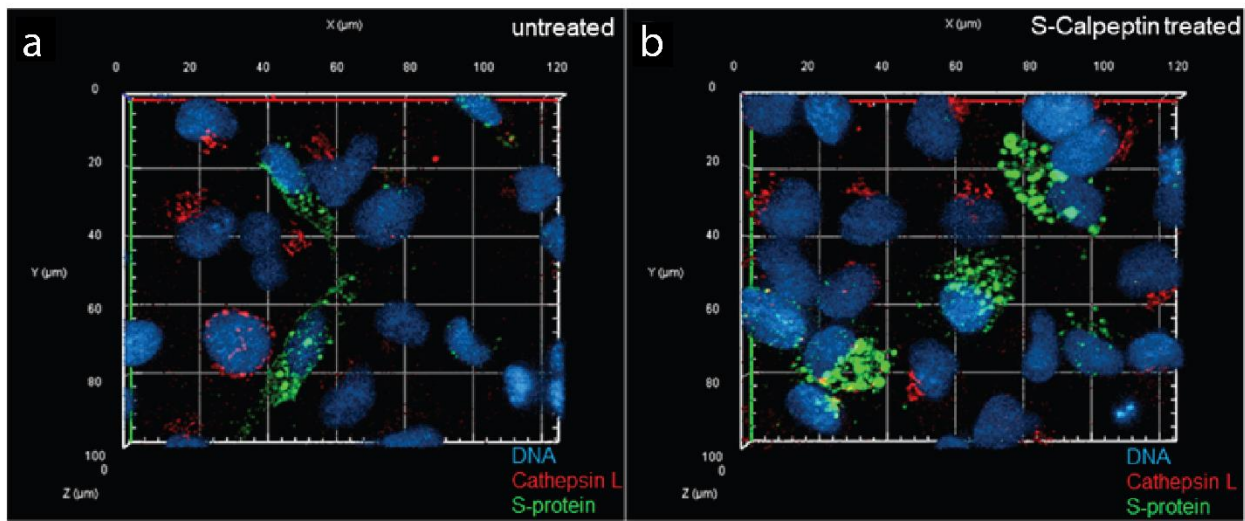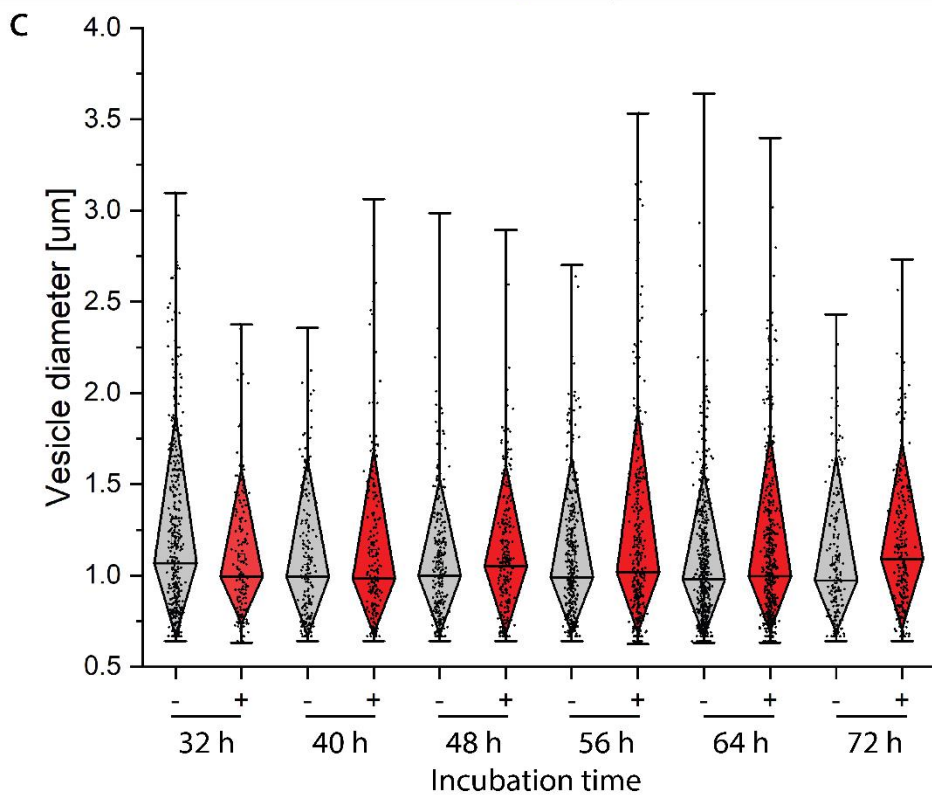

**Figure S5.**

**Viral S-protein immunofluorescence microscopy.** Representative image from 3D fluorescence microscopy of LC-HK2 cells infected with SARS-CoV-2 at a multiplicity of infection (M.O.I) of 0.05 (a) or treated with S-Calpeptin (b). Co-staining of S-protein (green), CatL (red) and DNA by Hoechst (blue). (c) Vesicle size analysis of various incubation timepoints after SARS-CoV-2 infections in the absence (-) or presence (+) of S-Calpeptin. Images were processed using ZEN (Blue) 2.6 software (ZEISS). Data are shown in diamond box plots (quartiles around median as diamond box, outer quartiles as whiskers).



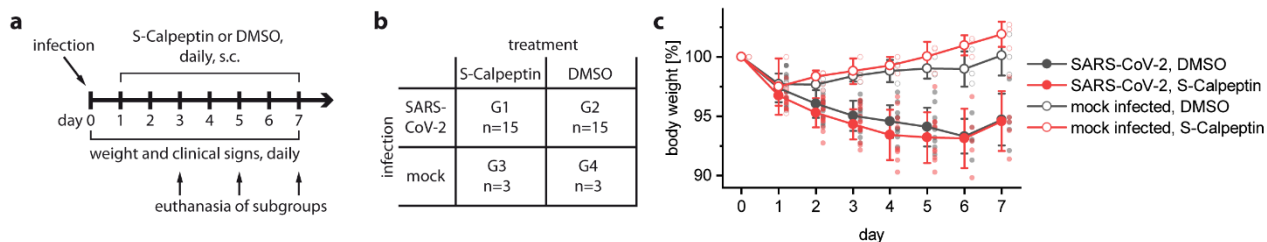

## 211 Figure S6.

### 212 Study design and weight of Golden Syrian hamsters infected with SARS-CoV-2 and treated

213 with S-Calpeptin. (a) Study design. The experiment lasted for seven days, animals were infected

214 with SARS-CoV-2 or non-infected (Dulbecco's Modified Eagle Medium with 2.5% fetal bovine

215 serum) intranasally on day zero and treated daily for seven days with 1 mg/kg of S-Calpeptin or

216 vehicle (DMSO) subcutaneously. Subgroups of SARS-CoV-2 infected animals (n=5, treated or

217 not) were euthanized on days 3, 5 and 7 post-infection (p.i.). Non-infected animals (treated or not)

218 were euthanized on day 7 p.i. (b) Overview over subgroups of all animals. G1: SARS-CoV-2-

219 infected, treated with S-Calpeptin; G2: SARS-CoV-2-infected, injected with DMSO; G3: Non-

220 infected, treated with S-Calpeptin; G4: Non-infected, injected with DMSO. (c) Mean percentual

221 weight change from day of infection of all four experimental groups. Error bars represent standard

222 deviation. Weight loss was significantly different between G1/G2 and G3/G4 ( $p \leq 0.05$ ). Data from

223 individual hamsters (smaller circles) are depicted with offset.



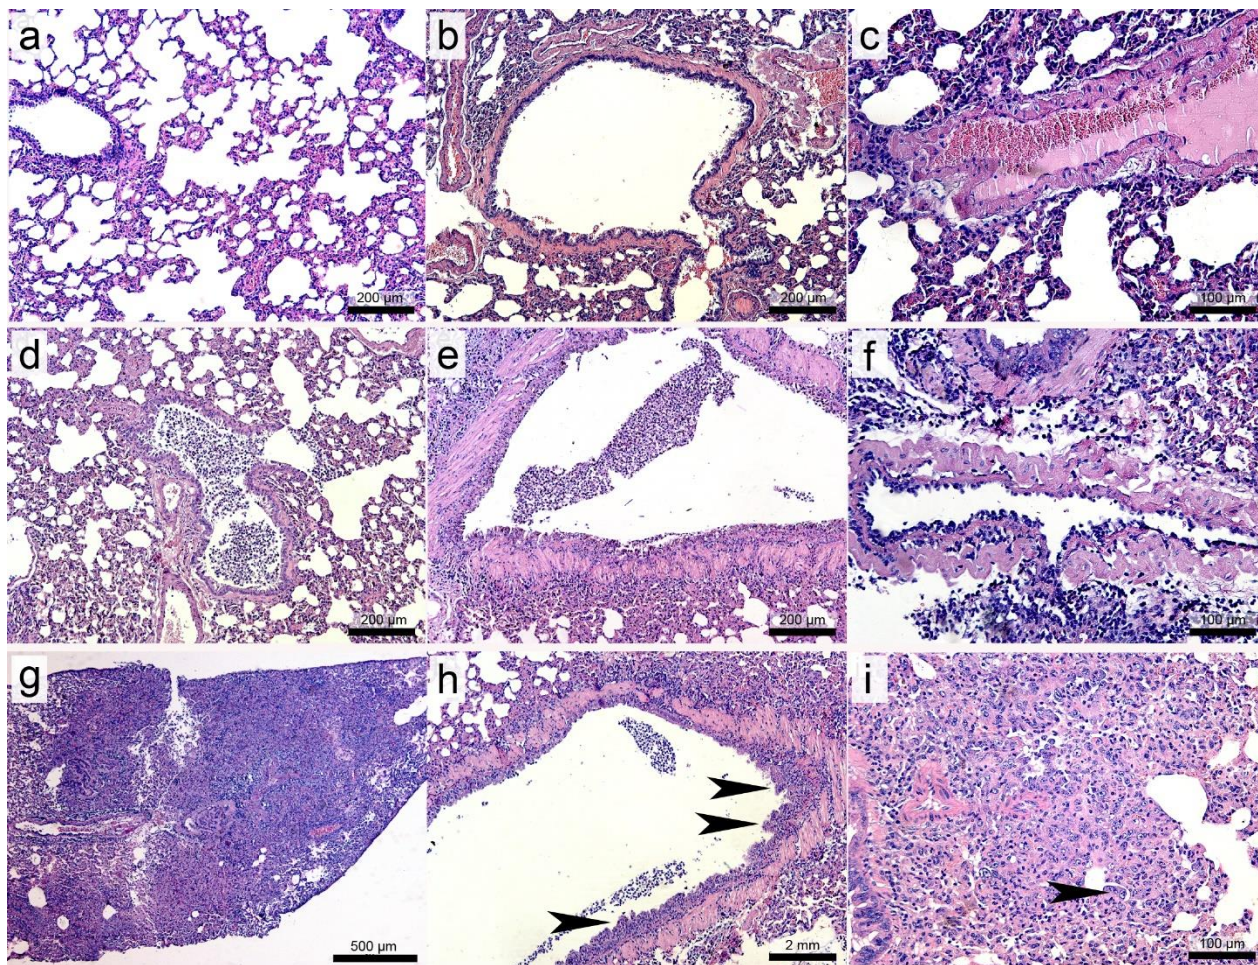

**Figure S7.**

**Representative histopathology findings in the lungs of Golden Syrian hamsters, hematoxylin**

**and eosin stain.** (a) Uninfected control with normal alveolar septa. (b) Bronchus from an

uninfected control. (c) Normal endothelial cells in an uninfected control. (d) Suppurative

bronchitis in a SARS-CoV-2-infected hamster treated with 1:100 DMSO, day 3 post-infection

(p.i.). (e) Necrosis of the bronchial epithelium and suppurative inflammation in a SARS-CoV-2-

infected hamster treated with 1:100 DMSO, day 3 p.i. (f) Endothelialitis with hypertrophied

endothelial cells and subendothelial inflammatory infiltrate in a medium sized blood vessel of a

SARS-CoV-2-infected hamster treated with 1 mg/kg of Calpeptin, day 5 p.i. (g) Severe and

diffuse bronchointerstitial pneumonia effacing the pulmonary parenchyma of a SARS-CoV-2-

infected hamster treated with 1 mg/kg of Calpeptin, day 5 p.i. (h) The bronchial epithelium is



236 hyperplastic (arrows). (i) Alveolar type II epithelial cells are hyperplastic and line the alveoli with  
237 occasional atypical syncytial cells (arrow).

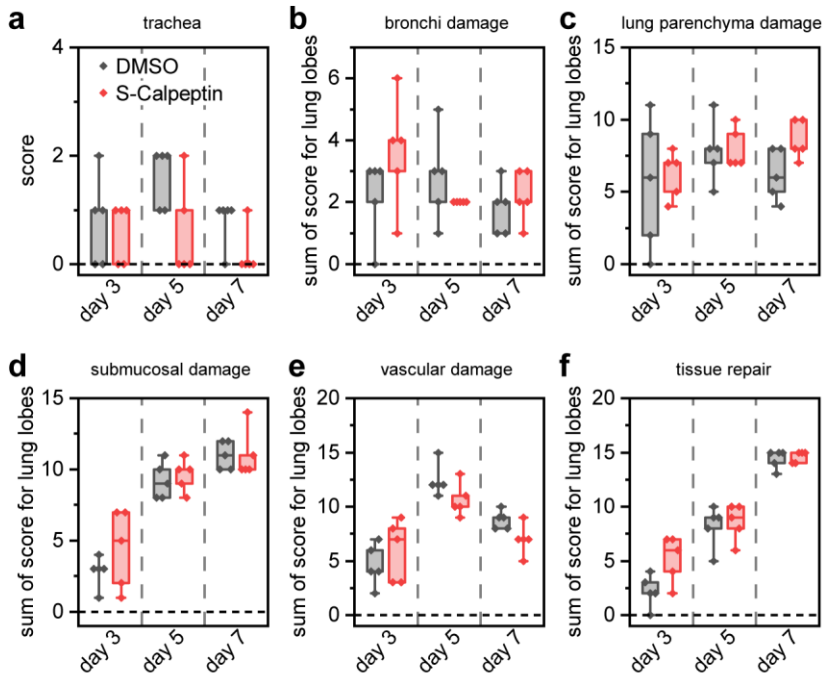

238

239

**Figure S8.**

240

**Histopathological analysis of tissue from SARS-CoV-2 infected and treated hamsters.**

241

Analysis for (a) trachea, (b) bronchi damage, (c) lung parenchyma damage, (d) submucosal

242

damage, (e) vascular damage, and (f) tissue repair. For (b-f) score is sum of analysis of 5 lung

243

lobes per animal. Values are expressed in median, interquartiles and range.

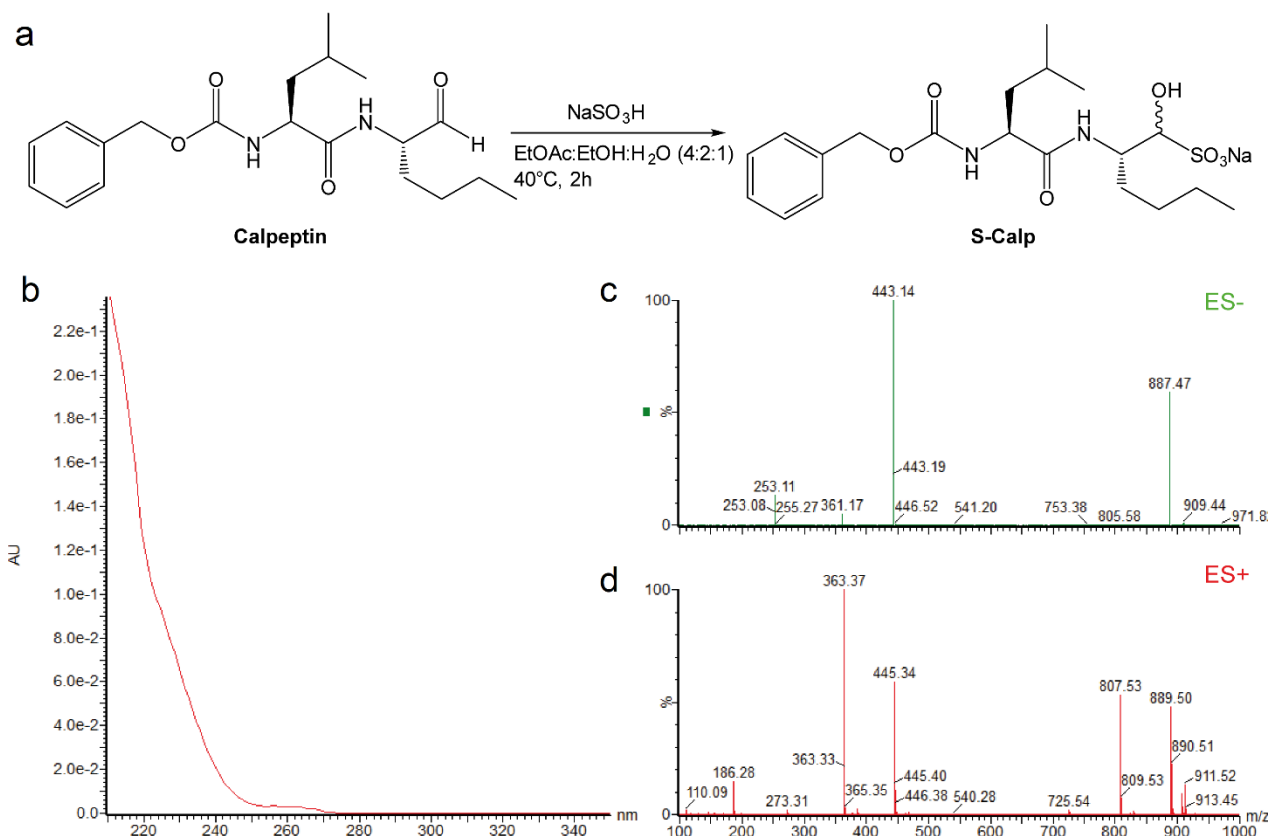

**Figure S9.**

**Synthesis of S-Calpeptin from Calpeptin.** (a) Reaction scheme to create S-Calpeptin, the bisulfite adduct of Calpeptin. (b) UV spectrum of product. (c) ES<sup>-</sup> and (d) ES<sup>+</sup> spectrum of product. Calculated  $m/z$  for  $C_{20}H_{31}N_4O_7S$   $[M-Na]^-$  is 443.1857 Da, found: 443.1887 Da.

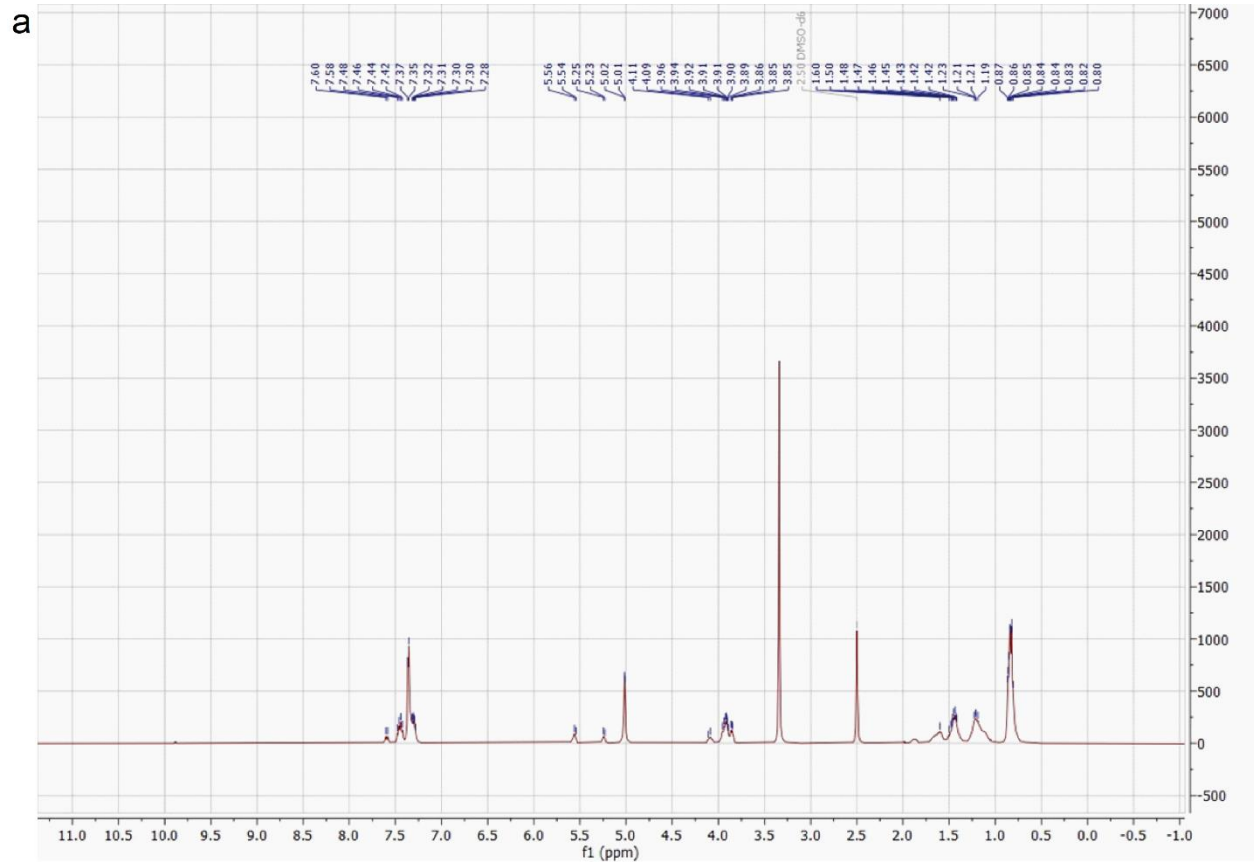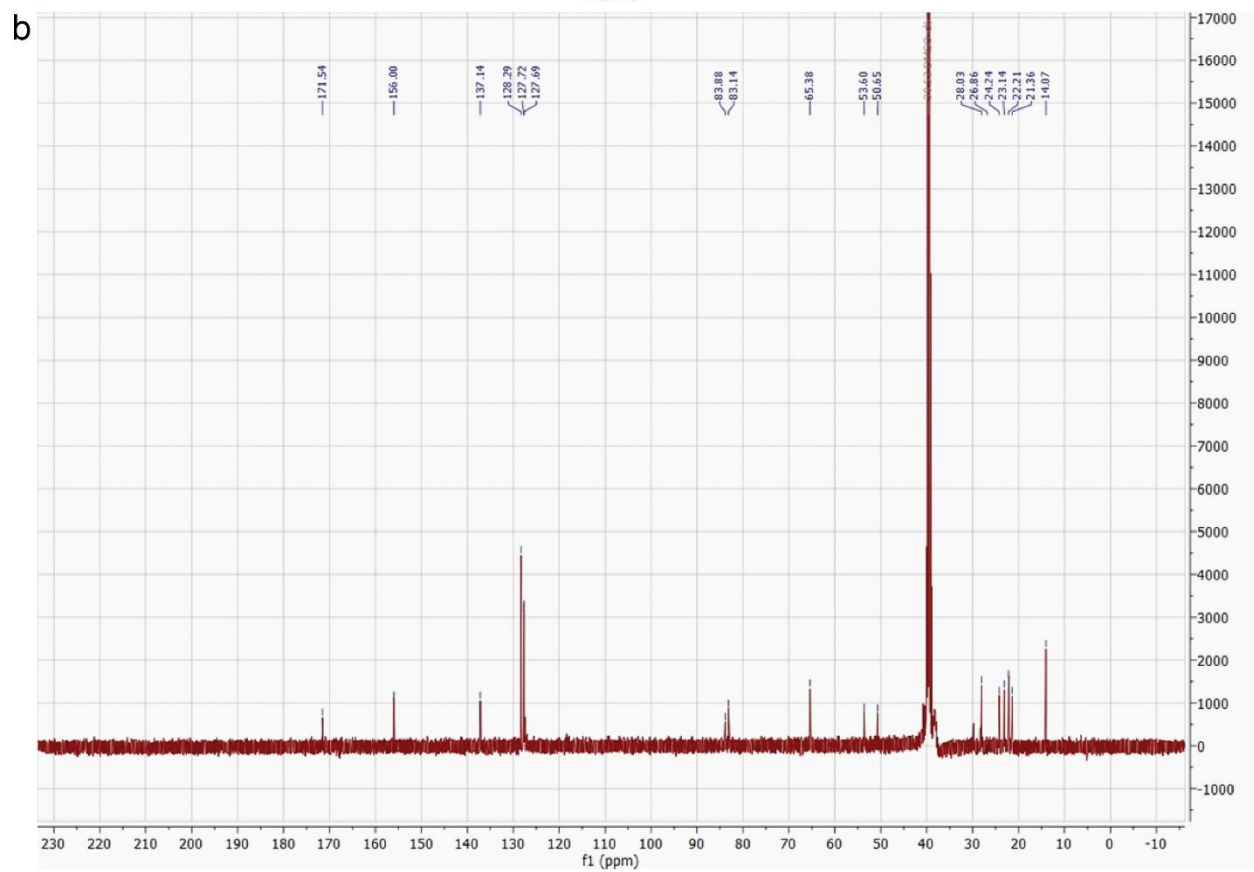

252 **Figure S10.**

253 **NMR analysis of S-Calpeptin.** (a)  $^1\text{H}$  NMR of bisulfite adduct S-Calpeptin recorded at 400 MHz  
254 in  $\text{DMSO-d}_6$ . (b)  $^{13}\text{C}$  NMR of bisulfite adduct S-Calpeptin recorded at 100 MHz in  $\text{DMSO-d}_6$ .

255

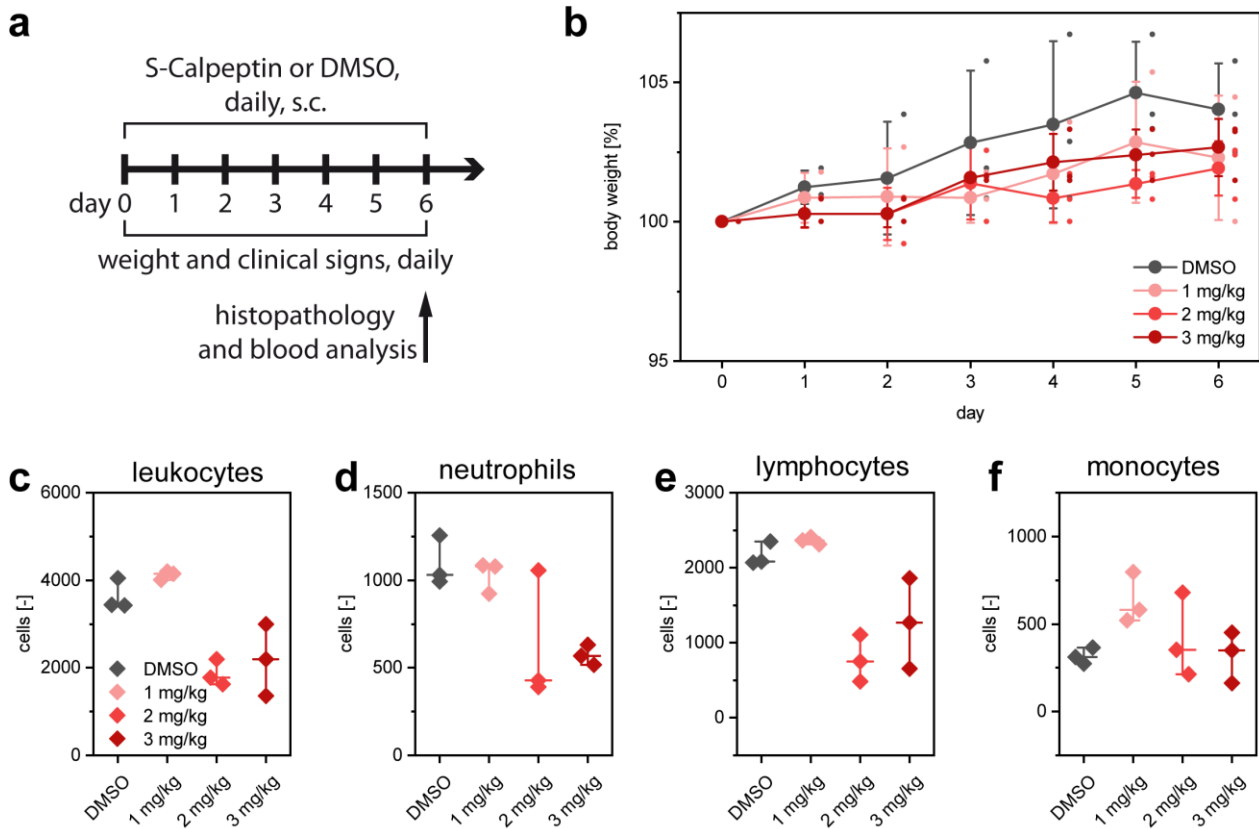

**Figure S11.**

**S-Calpeptin toxicity experiment.** (a) Study design for assessing toxicity of increasing S-Calpeptin doses. Each group included 3 Golden Syrian hamsters. Hamsters received a daily subcutaneous dose of S-Calpeptin (1 mg/kg, 2 mg/kg, or 3 mg/kg of body weight) suspended in 1:100 DMSO or a solution of 1:100 DMSO for seven consecutive days, starting at day zero. (b) Mean percentual weight change from day of infection of all four experimental groups. Data from individual hamsters (smaller circles) are depicted with an offset. Blood was analyzed on last day of experiment for cell count of leukocytes (c), neutrophils (d), lymphocytes (e), and monocytes (f). Median and range for all four groups is indicated.

267 **Figure S12.**

268 **Structure cards, with detailed information about inhibitors derived from X-ray structures.**

| <b>Cathepsin L, PDB: 7Z3T</b>                                                                              |                                                                                                             |
|------------------------------------------------------------------------------------------------------------|-------------------------------------------------------------------------------------------------------------|
| <b>Surface and cartoon depiction, superimposed monomers of AU</b>                                          |                                                                                                             |
| Superimposed cartoon:<br>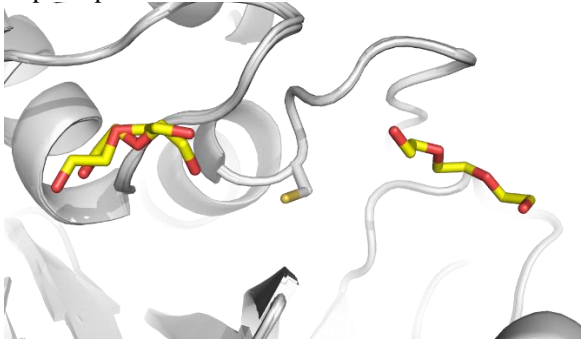 | Superimposed surface:<br> |
| <b>Structure and ligand features</b>                                                                       |                                                                                                             |
| <b>PDB structure code:</b> 7Z3T                                                                            | <b>PDB Ligand code:</b> -                                                                                   |
| <b>Resolution:</b> 1.6 Å                                                                                   | <b>R<sub>work</sub>/R<sub>free</sub>:</b> 0.16/0.19                                                         |
| <b>Space group:</b> 1 (P1)                                                                                 | <b>Unit cell:</b> 56.94 Å, 62.14 Å, 67.47 Å, 105.17°, 94.23°, 115.58°                                       |
| <b>Occupancy:</b> -                                                                                        | <b>Ligand RSCC/RSR:</b> -                                                                                   |

269

270

## Cathepsin L with bound Calpeptin, PDB: 7Z58

**Molecule A:** Refinement 2Fo-Fc map, 1.0  $\sigma$ -level

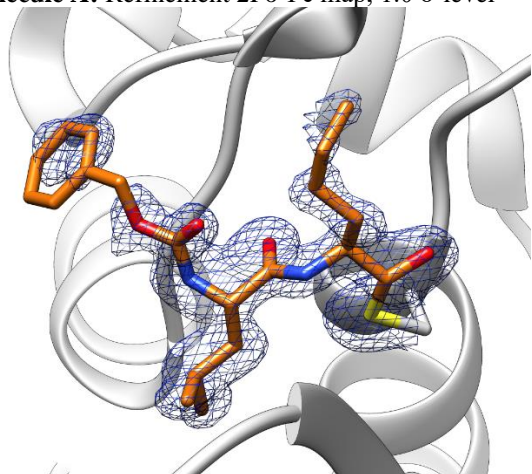

**Molecule B:** Refinement 2Fo-Fc map, 1.0  $\sigma$ -level

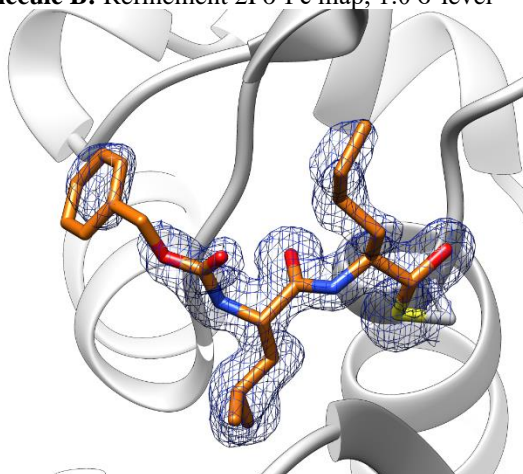

**Molecule C:** Refinement 2Fo-Fc map, 1.0  $\sigma$ -level

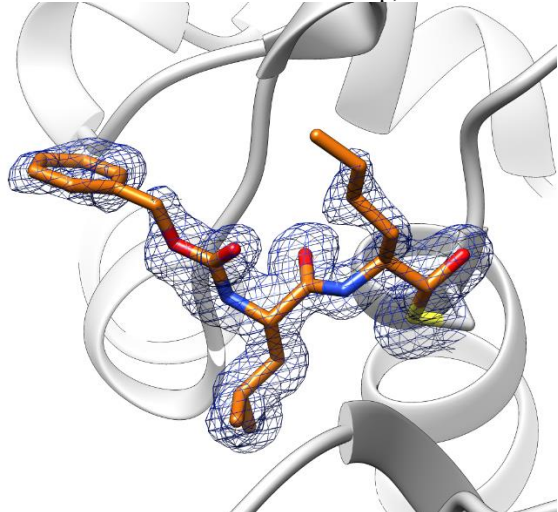

**Molecule D:** Refinement 2Fo-Fc map, 1.0  $\sigma$ -level

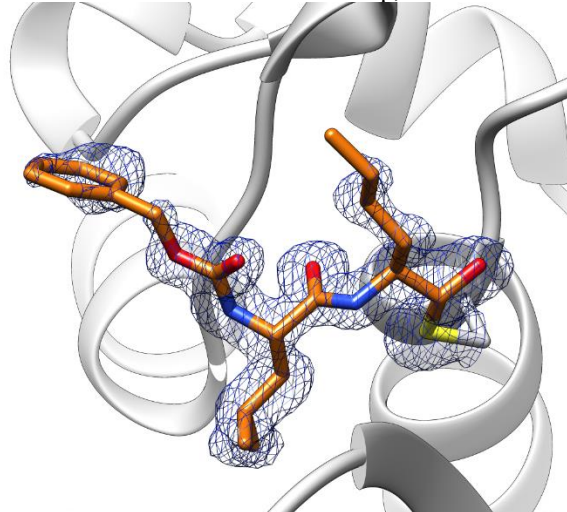

### Surface and cartoon depiction, superimposed monomers of AU

Superimposed Cartoon:

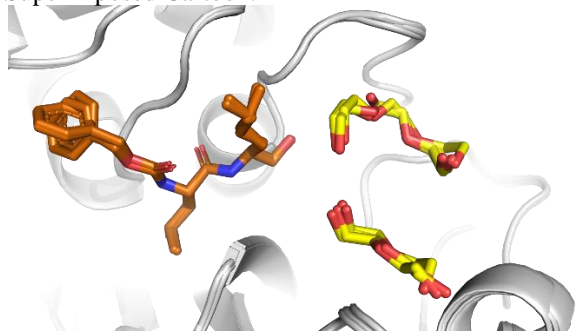

Superimposed surface:

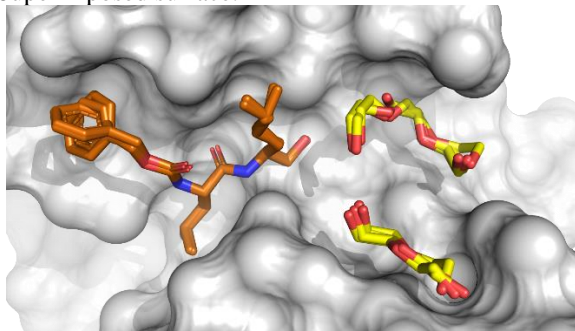

### Structure and ligand features

**PDB structure code:** 7Z58

**PDB Ligand code:** RN2

**Resolution:** 1.35 Å

**R<sub>work</sub>/R<sub>free</sub>:** 0.13/0.16

**Space group:** 1 (P1)

**Unit cell:** 57.18 Å, 62.45 Å, 67.82 Å, 105.58°, 93.13°, 115.56°

**Occupancy:** 1.0, 1.0, 1.0, 1.0

**Ligand RSCC/RSR:** 0.85/0.23, 0.89/0.20, 0.89/0.17, 0.89/0.23



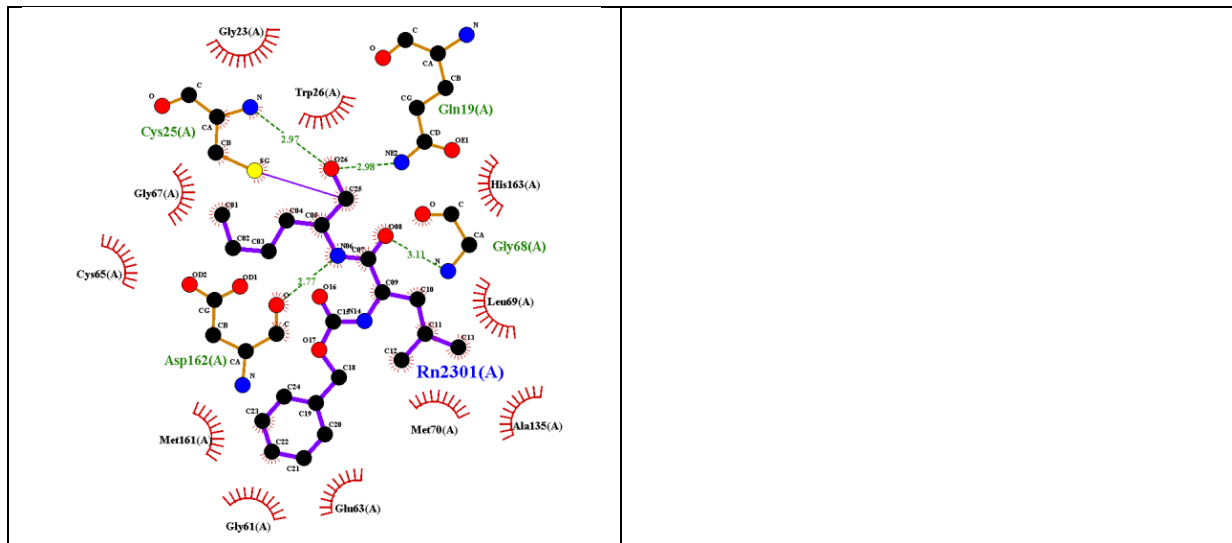

271

## Cathepsin L with bound GC-376, PDB: 7QKB

**Molecule A:** Refinement 2Fo-Fc map, 1.0  $\sigma$ -level

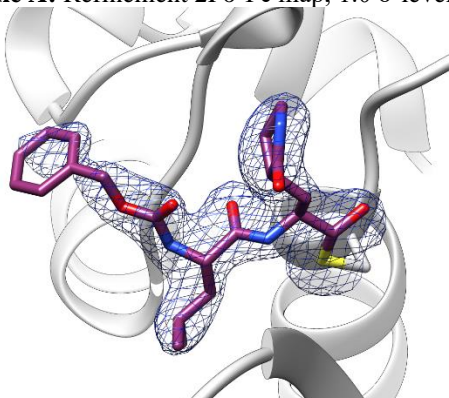

**Molecule B:** Refinement 2Fo-Fc map, 1.0  $\sigma$ -level

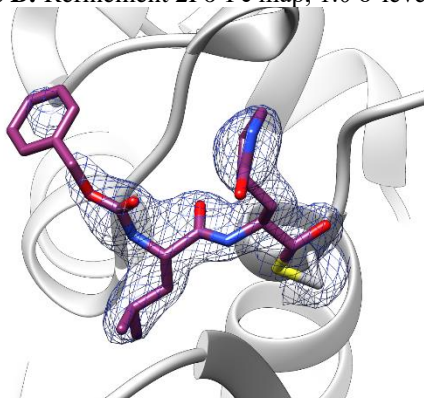

**Molecule C:** Refinement 2Fo-Fc map, 1.0  $\sigma$ -level

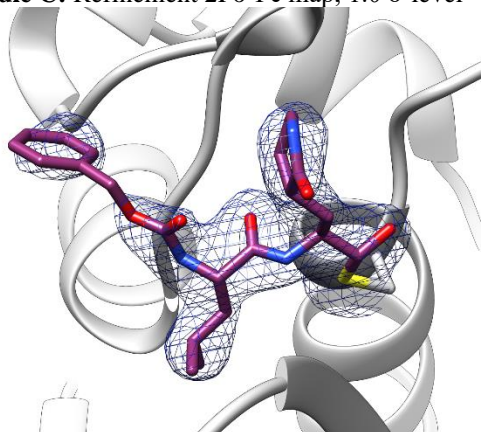

**Molecule D:** Refinement 2Fo-Fc map, 1.0  $\sigma$ -level

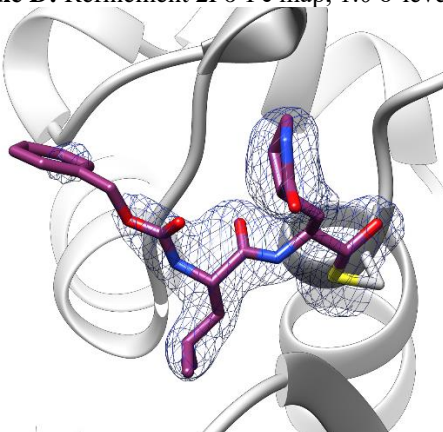

### Surface and cartoon depiction, superimposed monomers of AU

Superimposed Cartoon:

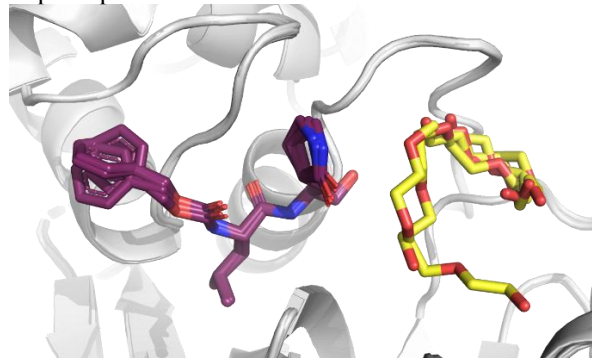

Superimposed surface:

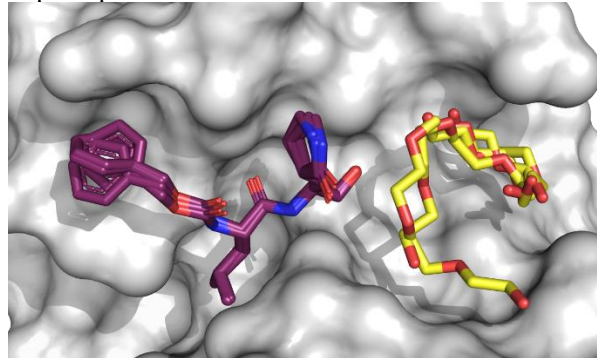

### Structure and ligand features

**PDB structure code:** 7QKB

**PDB Ligand code:** UED

**Resolution:** 1.8 Å

**R<sub>work</sub>/R<sub>free</sub>:** 0.17/0.20

**Space group:** 1 (P1)

**Unit cell:** 57.29 Å, 62.45 Å, 67.82 Å, 105.31°, 93.52°, 115.93°

**Occupancy:** 1.0, 1.0, 1.0, 1.0 (A, B, C, D)

**Ligand RSCC/RSR:** 0.88/0.24, 0.89/0.19, 0.89/0.19, 0.90/0.26 (A, B, C, D)

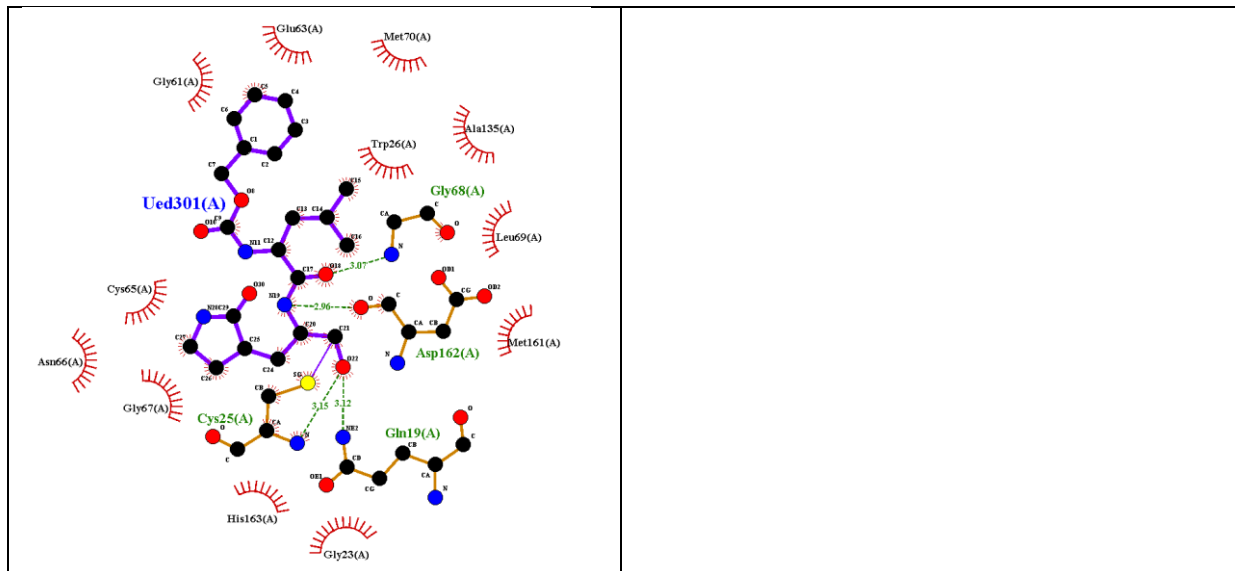

272  
 273  
 274  
 275  
 276  
 277  
 278

## Cathepsin L with bound S-Calpeptin, PDB: 7QKC

**Molecule A:** Refinement 2Fo-Fc map, 1.0  $\sigma$ -level

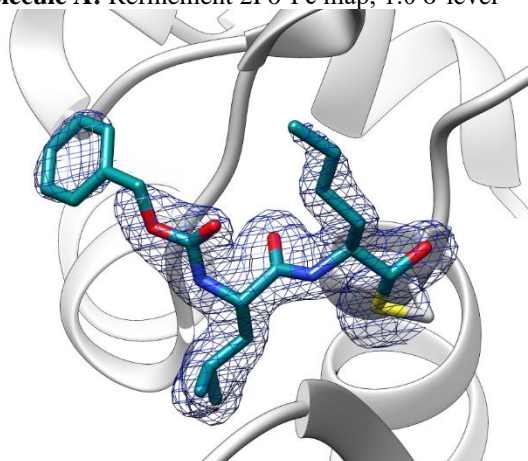

**Molecule B:** Refinement 2Fo-Fc map, 1.0  $\sigma$ -level

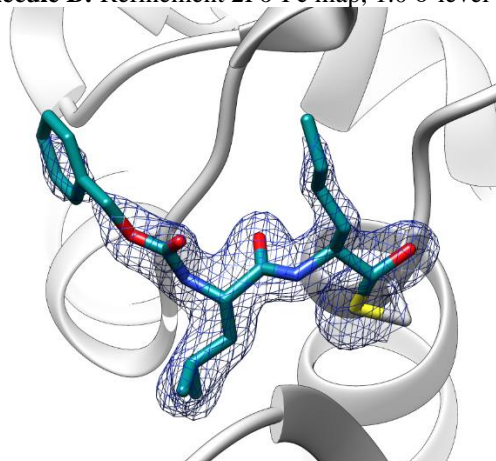

**Molecule C:** Refinement 2Fo-Fc map, 1.0  $\sigma$ -level

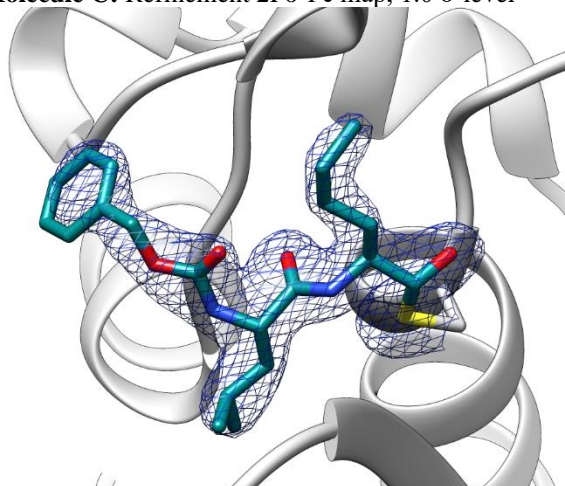

**Molecule D:** Refinement 2Fo-Fc map, 1.0  $\sigma$ -level

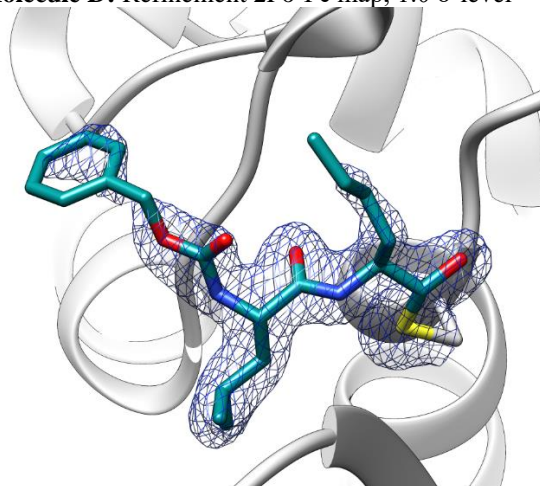

### Surface and cartoon depiction, superimposed monomers of AU

Superimposed cartoon:

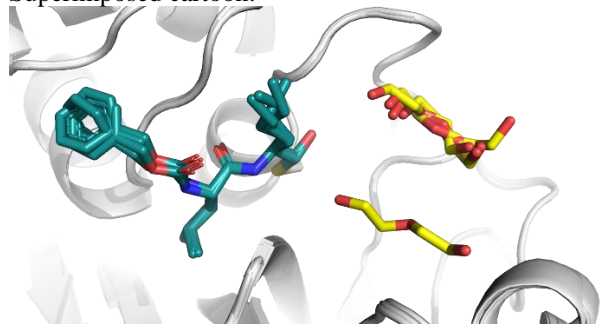

Superimposed surface:

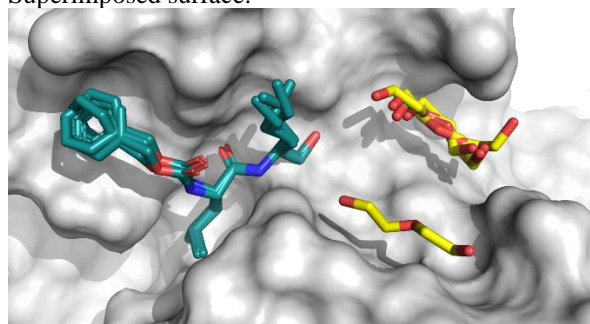

### Structure and ligand features

**PDB structure code:** 7QKC

**PDB Ligand code:** RN2

**Resolution:** 1.69 Å

**R<sub>work</sub>/R<sub>free</sub>:** 0.15/0.18

**Space group:** 1 (P1)

**Unit cell:** 113.67 Å, 53.36 Å, 44.99 Å, 90.00°, 102.51°, 90.00°

**Occupancy:** 1.0, 1.0, 1.0, 1.0 (A, B, C, D)

**Ligand RSCC/RSR:** 0.80/0.27, 0.87/0.24, 0.90/0.22, 0.89/0.27 (A, B, C, D)

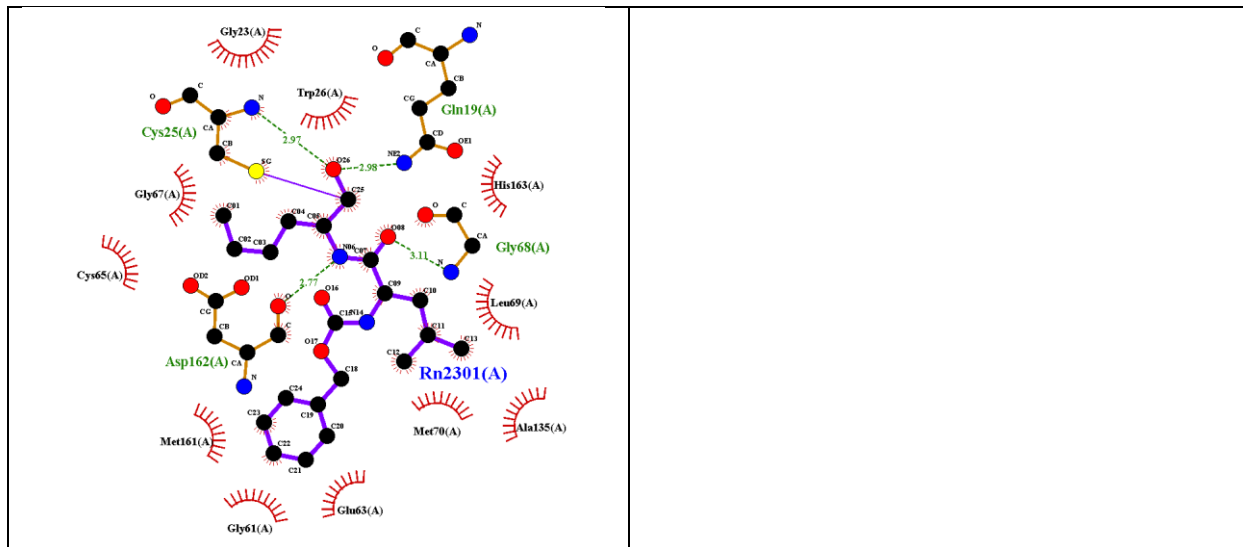

279



# M<sup>Pro</sup> with bound Calpeptin, PDB: 7AKU (Günther et al. 2021, Science)

Molecule A: Refinement 2Fo-Fc map, 1.0  $\sigma$ -level

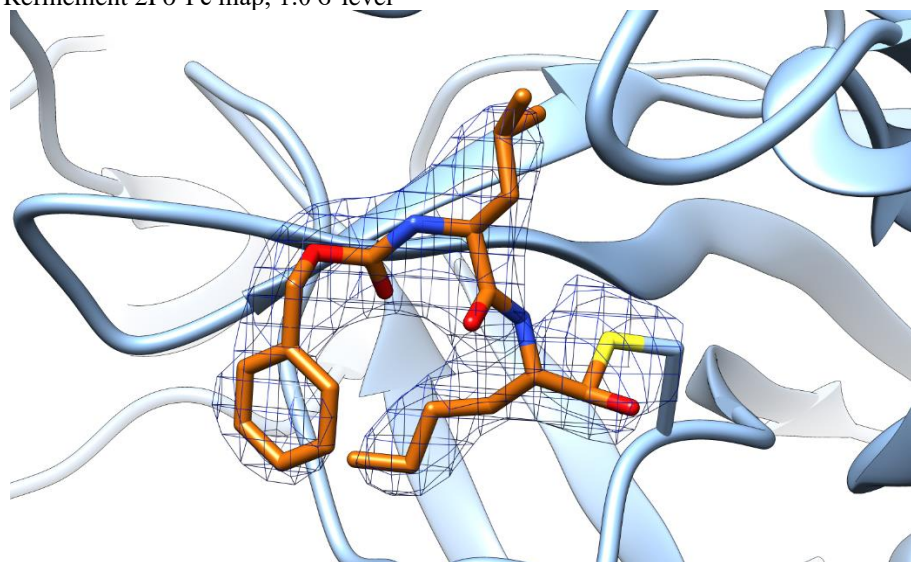

## Surface and cartoon depiction

Cartoon:

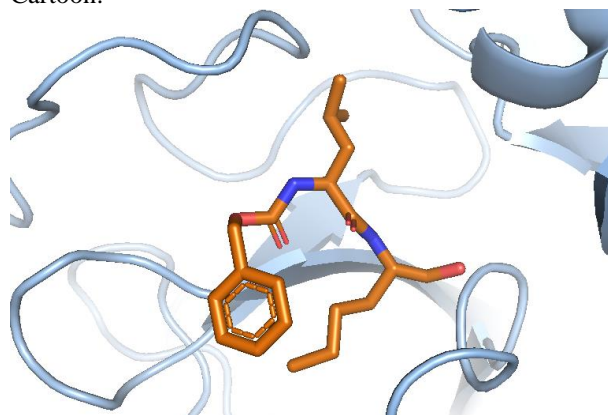

Surface:

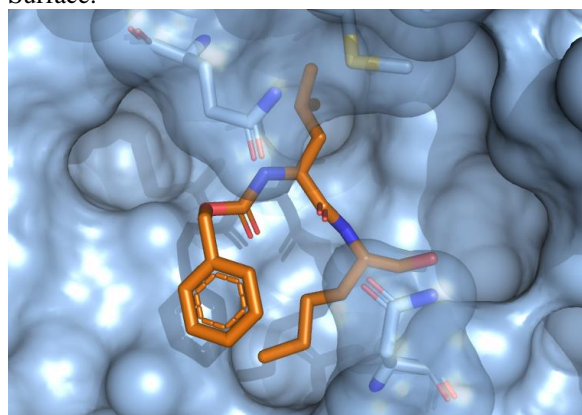

## Structure and ligand features

PDB structure code: 7AKU

PDB Ligand code: RN2

Resolution: 2.50 Å

R<sub>work</sub>/R<sub>free</sub>: 0.18/0.24

Space group: 5 (C 1 2 1)

Unit cell: 114.67 Å, 53.84 Å, 45.12 Å, 90.00°, 101.86°, 90.00°

Occupancy: 1.0

Ligand RSCC/RSR: 0.93/0.17

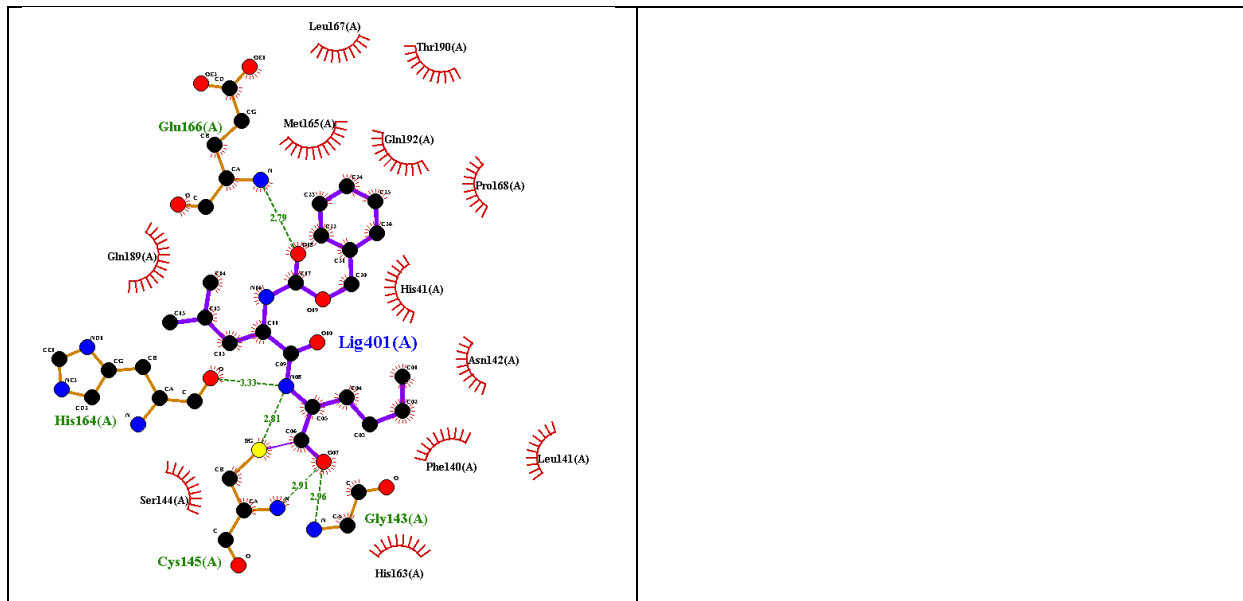

280

## M<sup>Pro</sup> with bound GC-376, PDB: 7QKA

Molecule A: Refinement 2Fo-Fc map, 1.0  $\sigma$ -level

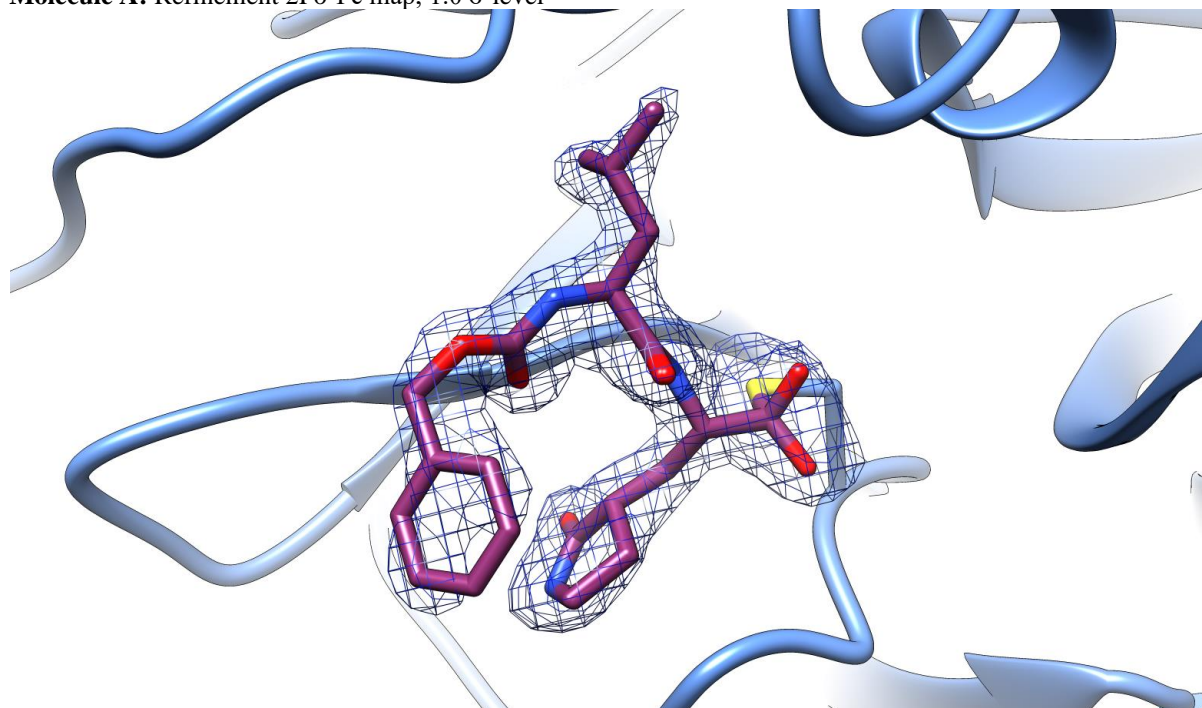

### Surface and cartoon depiction

Cartoon:

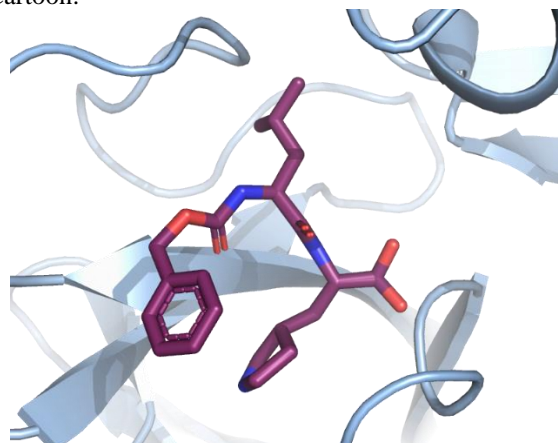

Surface:

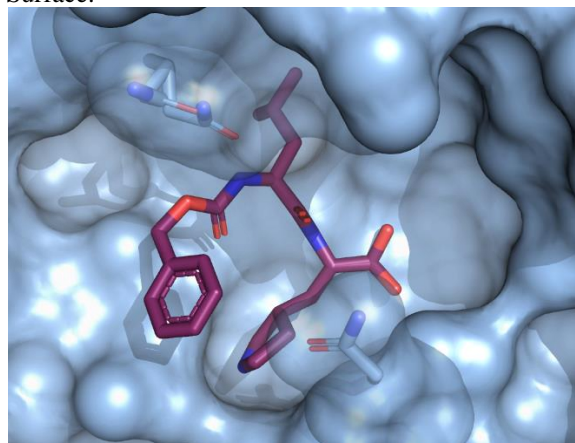

### Structure and ligand features

PDB structure code: 7QKA

PDB Ligand code: UED

Resolution: 1.8 Å

R<sub>work</sub>/R<sub>free</sub>: 0.16/0.21

Space group: 5 (C 1 2 1)

Unit cell: 113.67 Å, 53.36 Å, 44.99 Å, 90.00°,  
102.51°, 90.00°

Occupancy: 0.35 (conf A), 0.65 (conf B)

Ligand RSCC/RSR: 0.82/0.18 (conf A), 0.82/0.18  
(conf B)



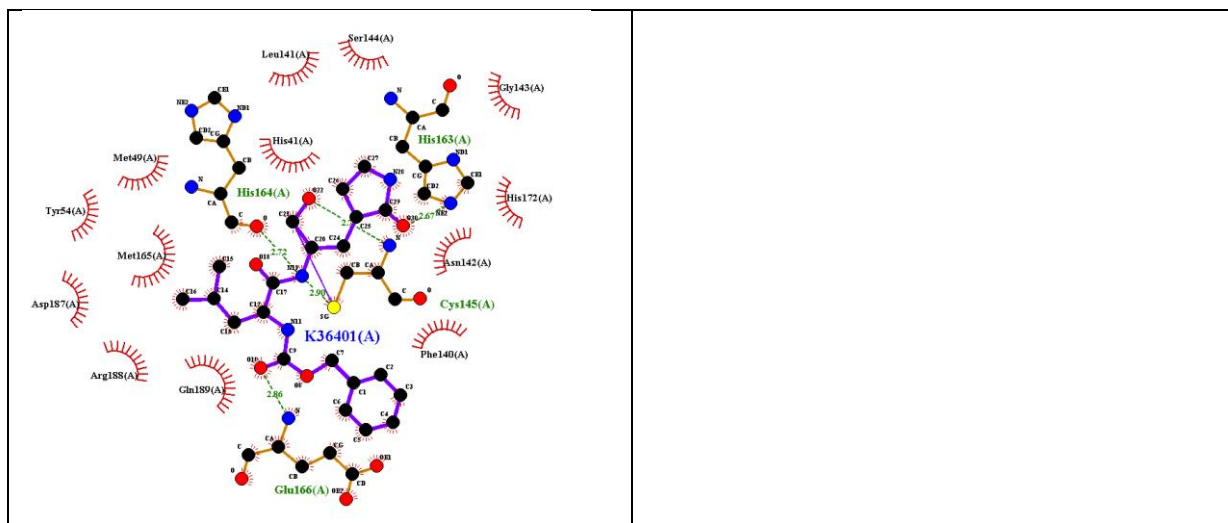

281  
 282  
 283  
 284  
 285  
 286  
 287  
 288  
 289  
 290  
 291  
 292  
 293  
 294  
 295  
 296  
 297  
 298  
 299  
 300  
 301  
 302  
 303  
 304

# M<sup>Pro</sup> with bound S-Calpeptin, PDB: 7Z3U

**Molecule A:** Refinement 2Fo-Fc map, 0.5  $\sigma$ -level

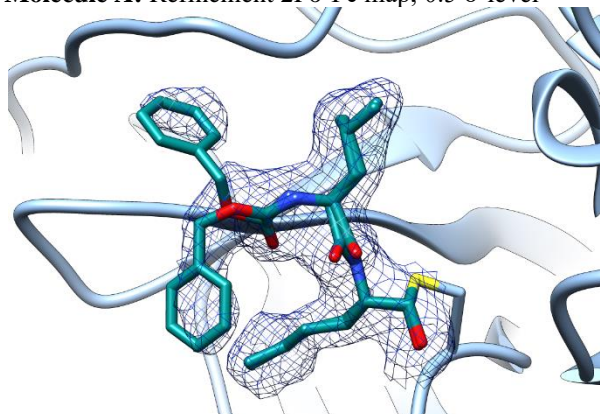

**Molecule B:** Refinement 2Fo-Fc map, 0.5  $\sigma$ -level

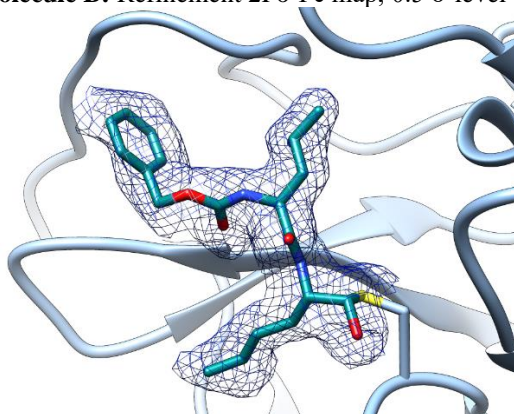

## Surface and cartoon depiction, superimposed monomers of AU

Superimposed cartoon:

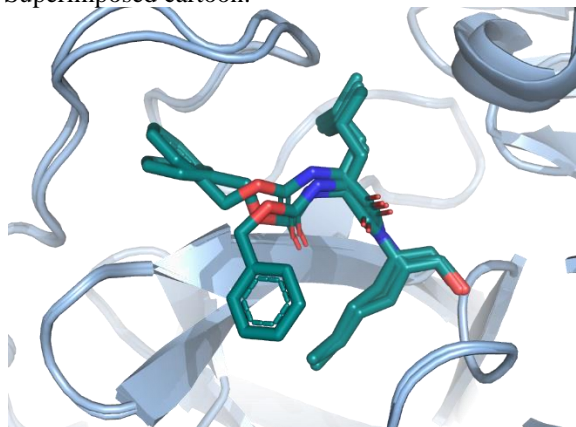

Superimposed surface:

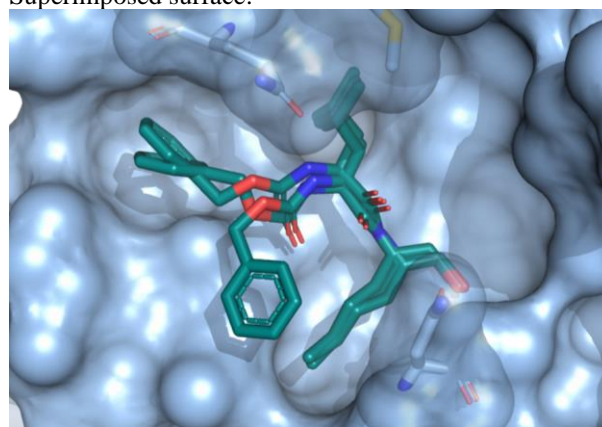

## Structure and ligand features

**PDB structure code:** 7Z3U

**PDB Ligand code:** RN2

**Resolution:** 1.72 Å

**R<sub>work</sub>/R<sub>free</sub>:** 0.19/0.22

**Space group:** 19 (P 21 21 21)

**Unit cell:** 67.69 Å, 99.60 Å, 103.26 Å, 90.00°, 90.00°, 90.00°

**Occupancy:** 0.47 (AA), 0.53 (AB), 1.0 (B)

**Ligand RSCC/RSR:** 0.86/0.17, 0.86/0.17 (A, B)

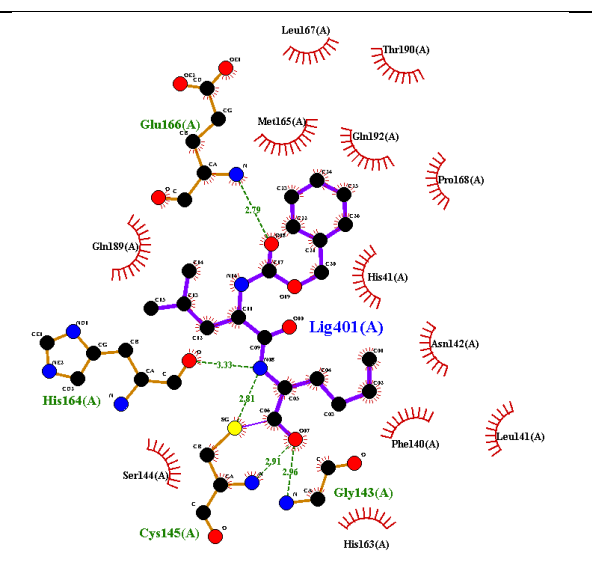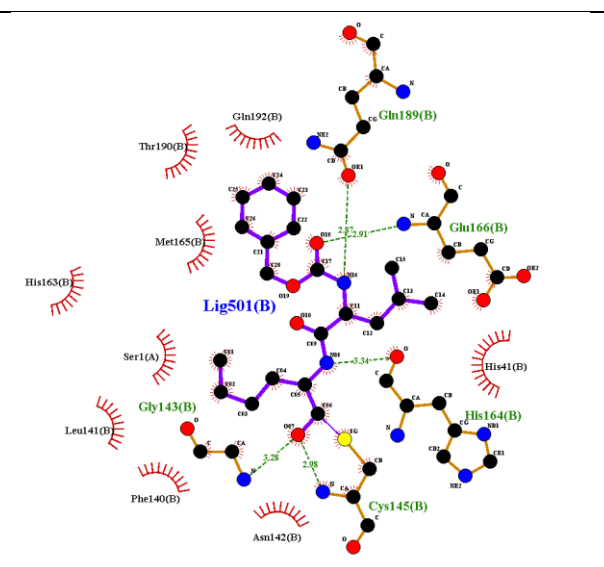

# Cathepsin V with bound S-Calpeptin, PDB: 7QGW

**Molecule A:** Refinement 2Fo-Fc map, 1.0  $\sigma$ -level

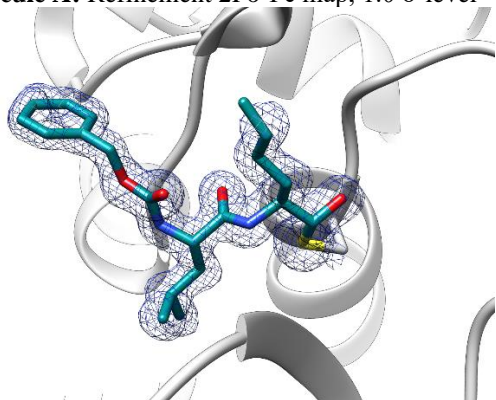

**Molecule B:** Refinement 2Fo-Fc map, 1.0  $\sigma$ -level

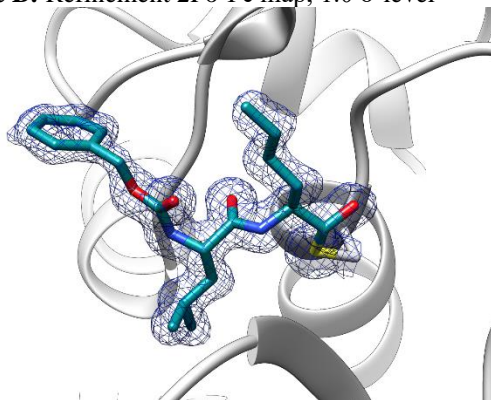

## Surface and cartoon depiction, superimposed monomers of AU

Superimposed Cartoon:

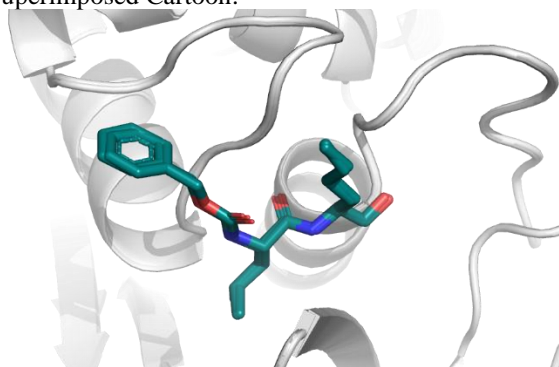

Superimposed surface:

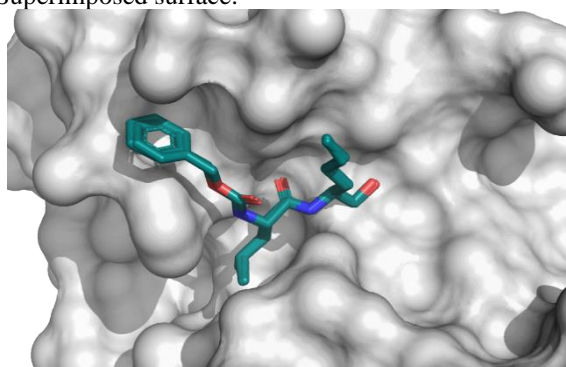

## Structure and ligand features

**PDB structure code:** 7QGW

**PDB Ligand code:** RN2

**Resolution:** 1.3 Å

**R<sub>work</sub>/R<sub>kick</sub>:** 0.17/0.20

**Space group:** 96 (P 43 21 2)

**Unit cell:** 94.24 Å, 94.24 Å, 126.96 Å, 90.0°, 90.0°, 90.0°

**Occupancy:** 1.0, 1.0 (A, B)

**Ligand RSCC/RSR:** 0.92/0.09, 0.93/0.09 (A, B)

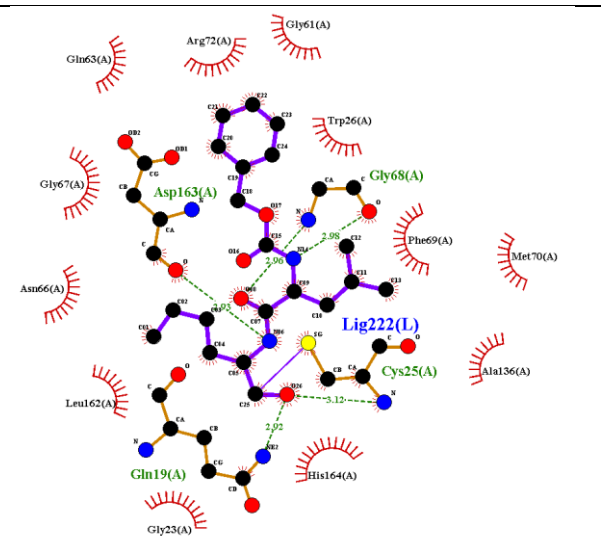

# Cathepsin K with bound S-Calpeptin (activated), PDB: 8C3D

Molecule A: Refinement 2Fo-Fc map, 1.0  $\sigma$ -level

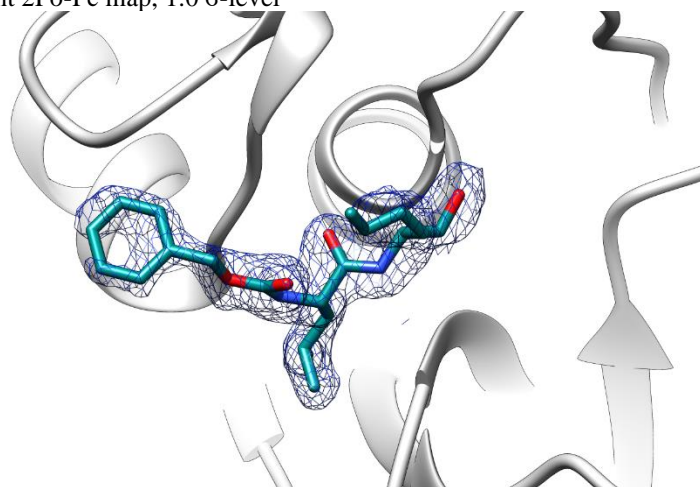

## Surface and cartoon depiction

Superimposed Cartoon:

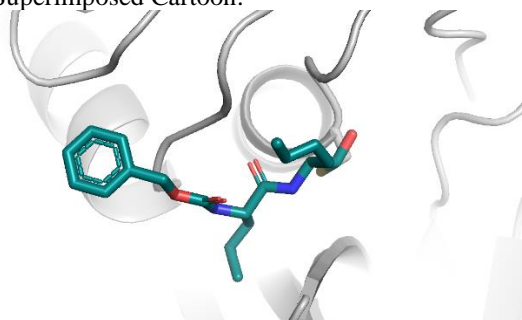

Superimposed surface:

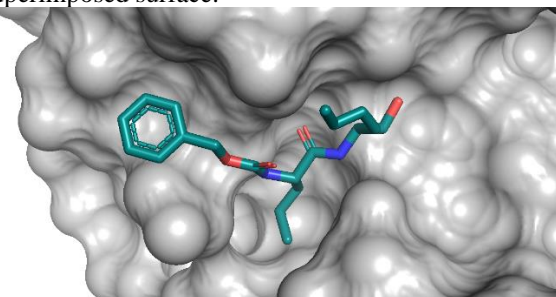

## Structure and ligand features

PDB structure code: 7QGW

PDB Ligand code: RN2

Resolution: 1.3 Å

R<sub>work</sub>/R<sub>kick</sub>: 0.17/0.20

Space group: 96 (P 43 21 2)

Unit cell: 94.24 Å, 94.24 Å, 126.96 Å, 90.0°, 90.0°, 90.0°

Occupancy: 1.0, 1.0 (A, B)

Ligand RSCC/RSR: 0.92/0.09, 0.93/0.09 (A, B)

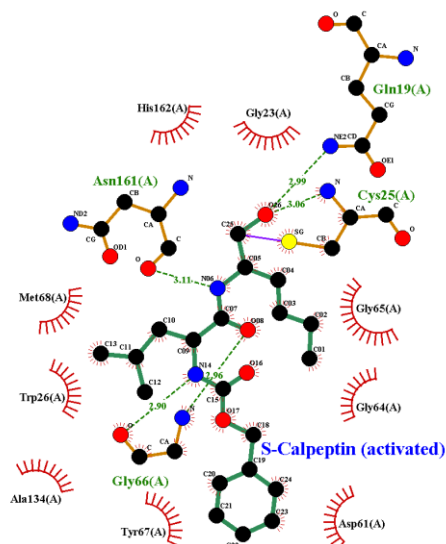

308 **Table S1.**  
 309 **Score system for histopathological analysis.** Parameters and scores for semiquantitative  
 310 histopathological evaluation of lungs from hamsters experimentally infected with SARS-CoV-2.  
 311

| Parameter                | Scores                                                                                                |                                                                          |
|--------------------------|-------------------------------------------------------------------------------------------------------|--------------------------------------------------------------------------|
|                          | <i>Bronchi</i>                                                                                        | <i>Pulmonary parenchyma</i>                                              |
| <b>Epithelial damage</b> | 0 - normal                                                                                            | 0 - normal                                                               |
|                          | 1 - degeneration (cuboidal cells)                                                                     | 1 - degeneration (cuboidal cells) and/or                                 |
|                          | 2 - epithelial detachment                                                                             | peribronchiolar inflammatory infiltrate                                  |
|                          | 3 - necrosis and sloughing                                                                            | 2 - epithelial detachment                                                |
|                          |                                                                                                       | 3 - necrosis and sloughing and/or bronchiolar<br>inflammatory infiltrate |
| <b>Submucosal damage</b> | 0 - normal                                                                                            |                                                                          |
|                          | 1 - edema, vascular ectasia, or mild inflammatory infiltrate affecting 10-33% of the<br>examined area |                                                                          |
|                          | 2 - moderate inflammatory infiltrate affecting 34-66% of the examined area                            |                                                                          |
|                          | 3 - marked inflammatory infiltrate affecting >67% of the examined area                                |                                                                          |
| <b>Vascular damage</b>   | 0 - normal                                                                                            |                                                                          |
|                          | 1 - perivascular edema and/or endothelial hypertrophy                                                 |                                                                          |
|                          | 2 - mild perivascular inflammatory infiltrate and/or endothelialitis                                  |                                                                          |
|                          | 3 - inflammatory infiltrate in the vascular wall and/or below the endothelium (vasculitis)            |                                                                          |
| <b>Tissue repair</b>     | 0 - normal                                                                                            |                                                                          |
|                          | 1 - repair with pre-ciliated cells and/or hyperplasia of non-ciliated epithelium                      |                                                                          |
|                          | 2 - hyperplasia of alveolar type II epithelial cells with or without atypia                           |                                                                          |
|                          | 3 - hyperplasia of goblet cells, and/or presence of granulation tissue and/or fibrosis                |                                                                          |

312
