# Supplementary material for: Calpeptin is a potent cathepsin inhibitor and drug candidate for SARS-CoV-2 infections
Source: PubMed Central journal article supplement (PMC10584882; doi:10.1038/s42003-023-05317-9), 2023-10-18
Supplement: 42003_2023_5317_MOESM3_ESM.pdf [file 42003_2023_5317_MOESM3_ESM.pdf]

## **Description of Additional Supplementary Files**

**File name:** Supplementary Data 1

**Description:** Source data for the graphs in the figures.
